# Supplementary material for: Nuclear Receptor Nur77 Limits the Macrophage Inflammatory Response through Transcriptional Reprogramming of Mitochondrial Metabolism
Source: PubMed Central journal article supplement — Cell Rep. 2018 Aug 24;24(8):2127–2140.e7. doi: 10.1016/j.celrep.2018.07.065 (PMC6113932; doi:10.1016/j.celrep.2018.07.065), 2018-08-24
Supplement: mmc6.pdf [file mmc6.pdf]

# Nuclear Receptor Nur77 Limits the Macrophage Inflammatory Response through Transcriptional Reprogramming of Mitochondrial Metabolism

## Graphical Abstract

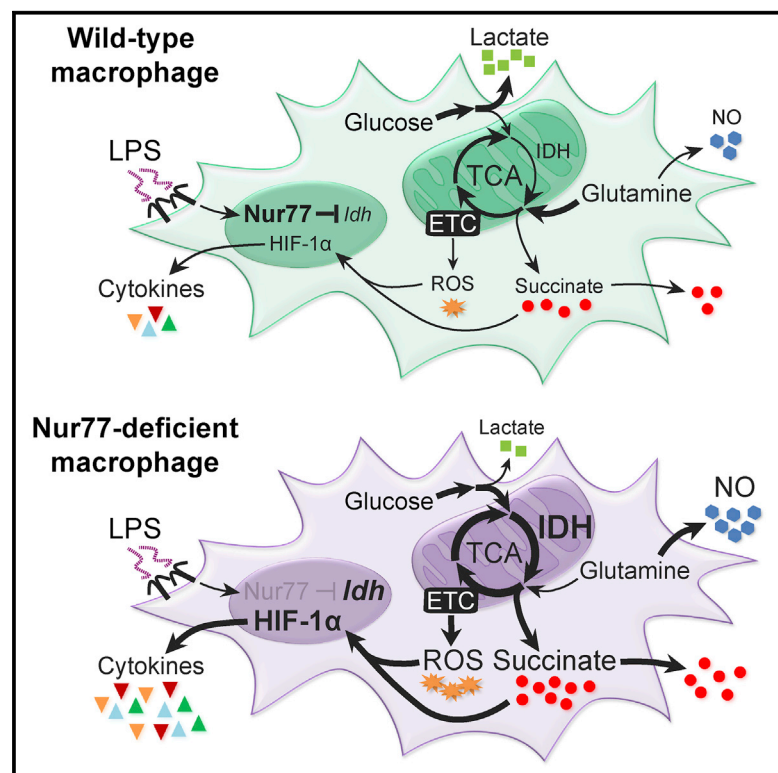

## Authors

Duco Steven Koenis, Lejla Medzikovic, Pieter Bas van Loenen, ..., Wilbert Zwart, Eric Kalkhoven, Carlie Jacoba de Vries

## Correspondence

c.j.devries@amc.nl

## In Brief

Koenis et al. show that nuclear receptor Nur77 regulates the reprogramming of mitochondrial metabolism in inflammatory macrophages. Nur77-deficient macrophages accumulate higher levels of succinate and produce more pro-inflammatory cytokines and nitric oxide in a succinate dehydrogenase-dependent manner. *In vivo*, bone marrow Nur77 deficiency exacerbates atherosclerosis and increases circulating succinate levels.

## Highlights

- Genome-wide profiling indicates that Nur77 regulates macrophage mitochondrial metabolism
- Nur77 inhibits IDH expression and TCA cycle activity in inflammatory macrophages
- Nur77-deficient macrophages produce more nitric oxide and cytokines via SDH
- Nur77 deficiency increases circulating succinate levels and atherosclerosis *in vivo*

## Data Resources

GSE102394

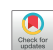

# Nuclear Receptor Nur77 Limits the Macrophage Inflammatory Response through Transcriptional Reprogramming of Mitochondrial Metabolism

Duco Steven Koenis,<sup>1</sup> Lejla Medzikovic,<sup>1</sup> Pieter Bas van Loenen,<sup>1</sup> Michel van Weeghel,<sup>2</sup> Stephan Huvneers,<sup>1</sup> Mariska Vos,<sup>1</sup> Ingrid Johanna Evers-van Gogh,<sup>3</sup> Jan Van den Bossche,<sup>1</sup> Dave Speijer,<sup>1</sup> Yongsoo Kim,<sup>4</sup> Lodewyk Wessels,<sup>5</sup> Noam Zelcer,<sup>1</sup> Wilbert Zwart,<sup>4</sup> Eric Kalkhoven,<sup>3</sup> and Carlie Jacoba de Vries<sup>1,6,\*</sup>

<sup>1</sup>Amsterdam UMC, University of Amsterdam, Medical Biochemistry, Amsterdam Cardiovascular Sciences, Meibergdreef 9, Amsterdam 1105 AZ, The Netherlands

<sup>2</sup>Amsterdam UMC, University of Amsterdam, Genetic Metabolic Diseases, Meibergdreef 9, Amsterdam 1105 AZ, The Netherlands

<sup>3</sup>Molecular Cancer Research and Center for Molecular Medicine, University Medical Centre Utrecht, Heidelberglaan 100, Utrecht 3584 CX, The Netherlands

<sup>4</sup>Division of Molecular Pathology, the Netherlands Cancer Institute, Plesmanlaan 121, Amsterdam 1066 CX, The Netherlands

<sup>5</sup>Division of Molecular Carcinogenesis, the Netherlands Cancer Institute, Plesmanlaan 121, Amsterdam 1066 CX, The Netherlands

<sup>6</sup>Lead Contact

\*Correspondence: [c.j.devries@amc.nl](mailto:c.j.devries@amc.nl)

<https://doi.org/10.1016/j.celrep.2018.07.065>

## SUMMARY

Activation of macrophages by inflammatory stimuli induces reprogramming of mitochondrial metabolism to support the production of pro-inflammatory cytokines and nitric oxide. Hallmarks of this metabolic rewiring are downregulation of  $\alpha$ -ketoglutarate formation by isocitrate dehydrogenase (IDH) and accumulation of glutamine-derived succinate, which enhances the inflammatory response via the activity of succinate dehydrogenase (SDH). Here, we identify the nuclear receptor Nur77 (*Nr4a1*) as a key upstream transcriptional regulator of this pro-inflammatory metabolic switch in macrophages. Nur77-deficient macrophages fail to downregulate IDH expression and accumulate higher levels of succinate and other TCA cycle-derived metabolites in response to inflammatory stimulation in a glutamine-independent manner. Consequently, these macrophages produce more nitric oxide and pro-inflammatory cytokines in an SDH-dependent manner. *In vivo*, bone marrow Nur77 deficiency exacerbates atherosclerosis development and leads to increased circulating succinate levels. In summary, Nur77 induces an anti-inflammatory metabolic state in macrophages that protects against chronic inflammatory diseases such as atherosclerosis.

## INTRODUCTION

Macrophages are an essential part of the innate immune system and form the first line of defense against invading pathogens. However, chronic inflammatory diseases such as atherosclerosis are driven in large part by a prolonged and excessive

macrophage-mediated inflammatory response, ultimately leading to the loss of local homeostasis and increased tissue damage (Moore and Tabas, 2011). Inhibiting excessive macrophage-mediated inflammation is therefore of considerable therapeutic interest, and a clinical trial studying the effects of pro-inflammatory cytokine interleukin (IL)-1 $\beta$  neutralization on cardiovascular morbidity and mortality has recently reported positive results (Ridker et al., 2017).

During the inflammatory response, macrophages produce immune effector molecules such as nitric oxide and cytokines to neutralize pathogens and recruit additional immune cells to the site of inflammation. Efficient production of such effector molecules by pro-inflammatory macrophages is dependent on several alterations in their cellular metabolism (Ryan and O'Neill, 2017). The three major metabolic hallmarks of pro-inflammatory macrophages include (1) suppressed mitochondrial oxidative phosphorylation (OXPHOS) and a dependence on increased glycolysis for energy; (2) a break in the tricarboxylic acid (TCA) cycle at isocitrate dehydrogenase (IDH), followed by an increase in glutamine-mediated anaplerosis; and (3) an accumulation of glutamine-derived succinate, which enhances reactive oxygen species (ROS) production, expression of the pro-inflammatory transcription factor hypoxia-inducible factor (HIF)-1 $\alpha$ , and, ultimately, pro-inflammatory cytokine production via succinate dehydrogenase (SDH) (Jha et al., 2015; Mills et al., 2016; Ryan and O'Neill, 2017).

Nur77 (*Nr4a1*) is a nuclear receptor that functions as a transcriptional activator or repressor, depending on coregulator protein recruitment and post-translational modifications (Kurakula et al., 2014). In human and mouse macrophages, Nur77 expression is induced by inflammatory stimuli such as lipopolysaccharide (LPS) and tumor necrosis factor (TNF)- $\alpha$  via nuclear factor kappa B (NF- $\kappa$ B) (Bonta et al., 2006; Pei et al., 2005). In turn, Nur77 has been shown to restrict the macrophage inflammatory response via the inhibition of NF- $\kappa$ B signaling (Bonta et al., 2006; Li et al., 2015a). Moreover, Nur77 deficiency exacerbates a variety of inflammation-driven pathologies, such as

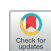

atherosclerosis (Hamers et al., 2012; Hanna et al., 2012; Hu et al., 2014) and LPS-induced sepsis (Li et al., 2015a). However, several observations suggest that the anti-inflammatory effects of Nur77 are not wholly mediated by the inhibition of NF- $\kappa$ B signaling. Nur77-deficient (Nur77-KO) macrophages produce higher levels of several pro-inflammatory cytokines, with the notable exception of TNF- $\alpha$ , the expression and secretion of which are unaffected (Hamers et al., 2012; Hanna et al., 2012). This lack of responsiveness is not consistent with NF- $\kappa$ B inhibition, but it is reminiscent of the anti-inflammatory effects of SDH inhibition, which also fails to attenuate TNF- $\alpha$  production (Lampropoulou et al., 2016; Mills et al., 2016). In addition, activation of NF- $\kappa$ B signaling is a rapid process, with nuclear translocation of NF- $\kappa$ B and target gene transcription starting within minutes of inflammatory stimulation. Detectable levels of nuclear Nur77 protein take several hours to accumulate, however (Pei et al., 2005). This temporal separation suggests that Nur77 cannot exert its anti-inflammatory effects until after the early, NF- $\kappa$ B-driven stage of the inflammatory response is well under way.

In this study, we examined the genome-wide Nur77 binding site profile and the Nur77-regulated transcriptome in macrophages. These experiments implicated Nur77 in the regulation of macrophage mitochondrial metabolism, and follow-up experiments showed that Nur77 is responsible for rewiring TCA cycle metabolism in pro-inflammatory macrophages. Furthermore, we show that a lack of Nur77-mediated metabolic changes in Nur77-deficient macrophages leads to excessive succinate production and SDH-driven nitric oxide and cytokine expression *in vitro*, and exacerbated atherosclerosis progression, circulating succinate accumulation, and lesion HIF-1 $\alpha$  protein levels *in vivo*.

## RESULTS

### Genome-wide Binding Site and Transcriptome Profiling Implicate Nur77 in the Regulation of Macrophage Mitochondrial Metabolism

To assess whether the anti-inflammatory effects of Nur77 are mediated by its activity as a transcription factor, we set out to characterize the target genes and genome-wide binding site profile of this nuclear receptor. We engineered RAW264.7 macrophage cell lines with the stable integration of a doxycycline (Dox)-inducible expression cassette that encoded either hemagglutinin (HA)-tagged Nur77 (HA-NUR77) or GFP as a control (Figure S1A). Dox treatment of these cells resulted in the strong expression of nuclear HA-NUR77 protein (Figures S1B and S1C) and induction of the established Nur77 target gene *Eno3* in a time- and concentration-dependent manner (Figure S1D). These stable RAW264.7 cell lines were then used for genome-wide Nur77 binding site and transcriptome profiling by chromatin immunoprecipitation sequencing (ChIP-seq) and RNA-seq-ueing (RNA-seq) (Figure 1A).

Using ChIP-seq, we identified 19,164 high-confidence Nur77 binding sites (Figure 1B). These binding sites were primarily found near gene-coding regions of the genome (Figures 1C and S1E). Inspection of the raw ChIP-seq data showed a significantly higher signal in the three Nur77 ChIP

replicates than in the input control (Figure 1D), and we successfully validated Nur77 binding sites from the ChIP-seq dataset by ChIP-qPCR for *Eno3*, *Cx3cr1*, and *Pfkfb3* loci (Figure S1F).

Analysis of the ChIP-seq dataset showed enrichment of sequence motifs for Nur77 and the macrophage lineage-specifying transcription factors PU.1 and CEBPB (Figure 1E). Analysis of publically available PU.1 and H3K4me1 ChIP-seq datasets showed strong PU.1 binding and enrichment of H3K4me1—a histone modification associated with enhancer regions—around RAW264.7 Nur77 binding sites in bone marrow-derived macrophage (BMDM), but not in bone marrow, spleen, liver, or heart datasets (Figure 1F). These results suggest that Nur77 binds at genomic loci that are physiologically relevant to macrophages in our stable RAW264.7 cell lines.

Hierarchical clustering of the Nur77 RNA-seq dataset revealed good reproducibility of the biological replicates of this experiment, allowing us to identify 2,611 genes downregulated and 2,750 genes upregulated by Nur77 overexpression in RAW264.7 macrophages (Figure 1G; Table S1). We validated Nur77-mediated transcriptional regulation of three target genes identified in the RNA-seq dataset (*Cx3cr1*, *Eno3*, and *Pfkfb3*) by RT-qPCR (Figure S1G). We next linked our Nur77 ChIP-seq and RNA-seq datasets using the BETA software package (Wang et al., 2013) to identify genes under the direct control of Nur77. Pathway analyses of Nur77-regulated genes with associated Nur77 binding sites identified several processes known to be regulated by Nur77, such as mitogen-activated protein kinase (MAPK) and cytokine signaling (Li et al., 2015a), but also several pathways hitherto not known to involve Nur77 in macrophages, most notably several metabolic pathways (Figure 1H).

### Nur77 Is Required for Normal Mitochondrial Activity in Naive Macrophages

Our genome-wide profiling experiments showed the enrichment of metabolic pathways. We therefore set out to assess the role of Nur77 in macrophage metabolism. Nur77 knockdown in RAW264.7 macrophages resulted in a lower basal, ATP synthase-coupled, and maximal (uncoupled) oxygen consumption rate (OCR), a measure of mitochondrial OXPHOS (Figures 2A and S2A). Similar results were obtained using BMDMs from wild-type (WT) and Nur77-KO mice (Figure 2B).

In response to inflammatory stimuli, macrophages switch from OXPHOS to glycolysis as their main source of energy (Ryan and O'Neill, 2017). Stimulating BMDMs with LPS induced expression of Nur77 in WT but not in Nur77-KO BMDMs (Figure S2B) and caused a significant reduction in OXPHOS in both cell populations (Figures 2B and S2C). Both proton leak (the proportion of oxygen consumption without concomitant ATP generation) and coupling efficiency (the proportion of oxygen consumption used for ATP generation) were significantly lower in Nur77-KO BMDMs compared to WT (Figures 2B and S2C). One possible explanation for this paradoxical decrease in both parameters is that LPS-activated Nur77-KO BMDMs instead suffer from increased electron leak, an unintended exit of electrons from the electron transport chain (ETC) that leads to ROS production.

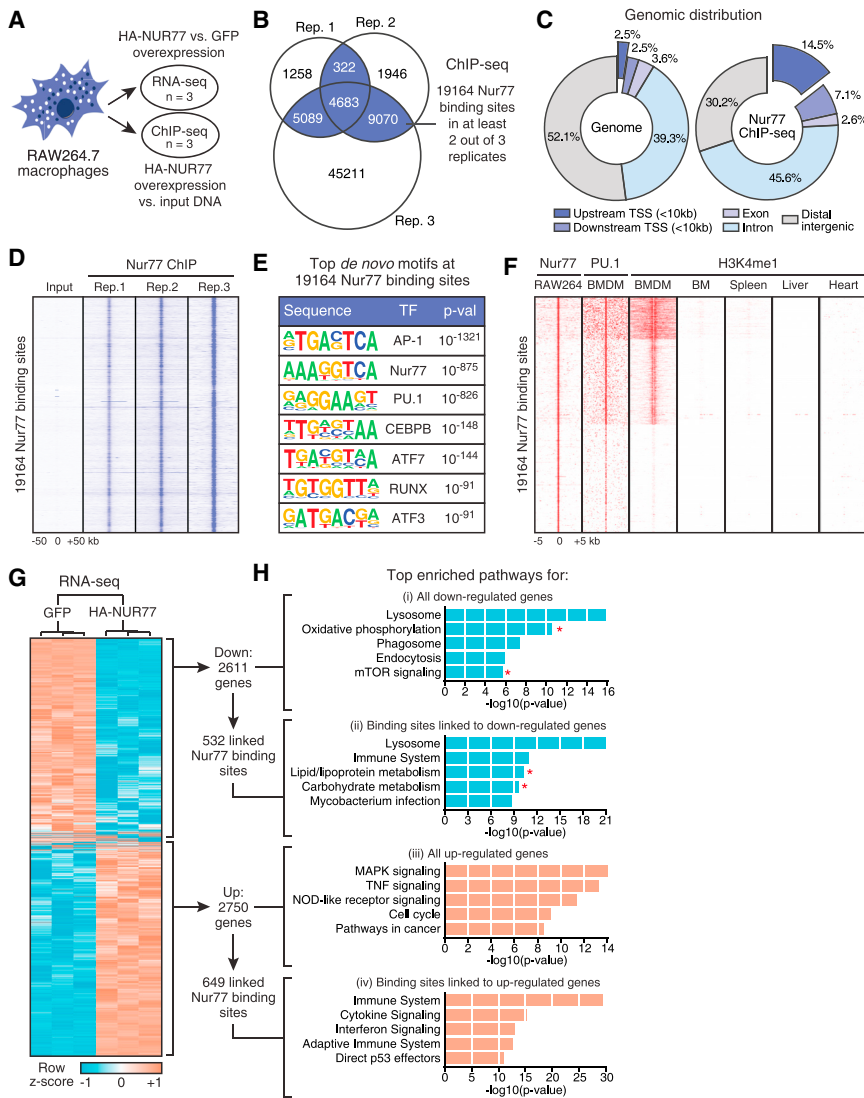

**Figure 1. Genome-wide Binding Site and Transcriptome Profiling Implicate Nur77 in the Regulation of Macrophage Mitochondrial Metabolism**

(A) ChIP-seq and RNA-seq experimental setup in RAW264.7 with inducible overexpression of HA-NUR77 or GFP.

(B) Venn diagram of Nur77 binding sites in ChIP-seq dataset. Binding sites present in at least 2 of 3 ChIP replicates were used for further analyses.

(C) Genomic distribution of 19,164 Nur77 binding sites in RAW264.7.

(D) ChIP-seq signal for RAW264.7 input and Nur77 ChIP samples in 100 kb window around 19,164 Nur77 binding sites.

(E) Top enriched *de novo* transcription factor (TF) motifs within 200 bp of 19,164 Nur77 binding sites.

(F) ChIP-seq signal for Nur77, PU.1, and H3K4me1 in indicated cell types in 5 kb window around 19,164 Nur77 binding sites in RAW264.7.

(G) Hierarchical clustering and Z score heatmap of Nur77-regulated genes as determined by RNA-seq.

(H) Top enriched pathways for genes (i) down- and (iii) upregulated by Nur77 overexpression in RNA-seq dataset or Nur77 binding sites linked to (ii) down- and (iv) upregulated genes in ChIP-seq dataset. Asterisks indicate metabolic pathways. See also [Figure S1](#).

(Figure 2D). The differences in ATP levels between WT and Nur77-KO BMDMs disappeared upon treatment with oligomycin, a mitochondrial ATP synthase inhibitor, showing that non-mitochondrial (glycolytic) ATP production is not affected in Nur77-KO BMDMs (Figure 2D).

A possible explanation for the reduced mitochondrial activity in Nur77-KO BMDMs would be a reduced number of mitochondria. We quantified mitochondrial abundance in WT and Nur77-KO BMDMs by measuring the ratio of mitochondrial to nuclear DNA (Figure 2E) and the intensity of a mitochondria-specific fluorescent probe using flow cytometry (Figure 2F) or live-cell fluorescence microscopy (Figure 2G). These three experimental approaches showed that unstimulated Nur77-KO BMDMs had significantly lower numbers of mitochondria than WT BMDMs, explaining their reduced OXPHOS rates. This difference in mitochondrial abundance disappeared after treating cells with LPS, however (Figure 2E). Reduced numbers of mitochondria may be caused by increased degradation (mitophagy). We found that Nur77-KO BMDMs had numbers of lysosomes similar to WT BMDMs (Figure S2H) but that these lysosomes co-localized more extensively with mitochondria (Figure S2I; Video S1)—a measure of mitophagy (Dolman et al., 2013). Similar to mitochondrial abundance, this difference in mitophagy between WT and Nur77-KO BMDMs disappeared after stimulating cells with LPS (Figure S2I).

Both WT and Nur77-KO BMDMs also massively increased glycolytic lactate production in response to LPS, but Nur77-KO BMDMs did so to a lesser extent (Figures 2C and S2E). Similar results were found using Nur77-depleted RAW264.7 macrophages (Figures S2D and S2E). Because several glycolytic genes were upregulated by Nur77 in our RAW264.7 transcriptome profiling experiment (Figure S1G), we hypothesized that the reduced expression of these genes could be responsible for the observed reduction in glycolytic lactate production in Nur77-depleted cells. However, while Nur77 overexpression in RAW264.7 macrophages increased the expression of two crucially important glycolytic enzymes (*Pfkfb3* and *Pfkf*), the expression of these genes was unchanged in Nur77-KO BMDMs (Figures S2F and S2G).

Cells use OXPHOS and glycolysis to produce energy in the form of ATP. Consistent with their reduced OXPHOS, Nur77-KO BMDMs had significantly lower intracellular ATP levels than did WT BMDMs both before and after LPS stimulation



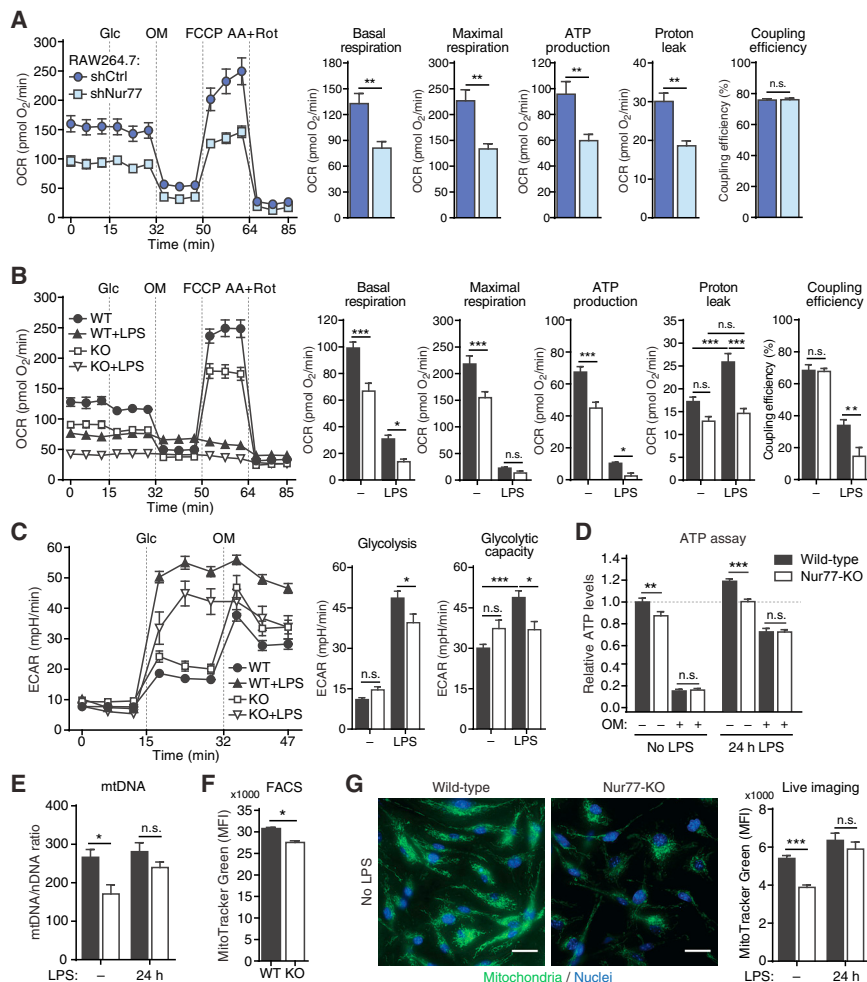

**Figure 2. Nur77 Is Required for Normal Mitochondrial Activity in Naive Macrophages**

(A and B) Oxygen consumption rate (OCR) after sequential injection of glucose (Glc), oligomycin (OM), carbonyl cyanide 4-trifluoromethoxyphenyl hydrazone (FCCP), and antimycin plus rotenone (AA+Rot) in RAW264.7 upon knock down of Nur77 (shNur77) versus control (shCtrl) (A), or in WT and Nur77-KO BMDMs left untreated or stimulated with LPS for 24 hr (B). Bar graphs show OXPHOS parameters derived from OCR values as illustrated in Figure S2C.

(C) Extracellular acidification rate (ECAR) in WT and Nur77-KO BMDMs left untreated or stimulated with LPS for 24 hr (B). Bar graphs show parameters of glycolysis from ECAR values, as illustrated in Figure S2E.

(D) Relative intracellular ATP in WT and Nur77-KO BMDMs left untreated or stimulated with LPS for 24 hr, followed by vehicle (-) or 5  $\mu$ M OM (+) for 2 min.

(E–G) Mitochondrial abundance in untreated or 24 hr LPS-stimulated WT and Nur77-KO BMDMs determined by ratio of mitochondrial (mt)DNA to nuclear (n)DNA (E), flow cytometry (fluorescence-activated cell sorting [FACS]) for MitoTracker Green FM staining (F), or live-cell imaging of mitochondria visualized with MitoTracker Green FM (G). MFI, median fluorescence intensity. Micrographs on the left show representative MitoTracker stained cells. Scale bar indicates 20  $\mu$ m.

Data are shown as means  $\pm$  SEMs ( $n = 6$  for [A]–[C];  $n = 3$  for [D], [F], and [G];  $n = 106$ –136 cells for [E]).  $p$  values were calculated using two-tailed Student's  $t$  test ([A]–[C], [E]–[G]) or two-way ANOVA with Tukey's post hoc test (D). n.s., non-significant. \* $p < 0.05$ , \*\* $p < 0.01$ , \*\*\* $p < 0.001$ . See also Figure S2.

**Nur77-Deficient Macrophages Fail to Downregulate IDH Expression and Accumulate Higher Levels of Succinate during Inflammation**

In addition to mitochondrial copy number, OXPHOS rates are regulated by the availability of TCA cycle-derived ETC substrates. We therefore decided to investigate a possible role for Nur77 in the regulation of the TCA cycle.

Mitochondrial IDH catalyzes a rate-limiting step of the TCA cycle and macrophages downregulate the expression and activity of this enzyme in response to inflammatory stimuli (Jha et al., 2015). We hypothesized that Nur77 mediates the downregulation of IDH expression during inflammation because we observed Nur77-mediated inhibition of a subset of TCA cycle genes—including several IDH isoforms—in our RAW264.7 RNA-seq dataset (Figure 3A). Furthermore, in our Nur77 ChIP-seq dataset, we found that there was a general enrichment of Nur77 binding near the transcriptional start sites (TSSs) of TCA cycle enzyme genes (Figure 3B), including near the TSSs of several mitochondrial IDH genes (Figure 3C). Nur77-KO BMDMs consistently expressed higher levels of several mitochondrial IDH isoforms (*Idh2*, *Idh3b*, *Idh3g*) both before and after LPS stimulation, while expression of cytosolic IDH (*Idh1*) and several other

TCA cycle enzyme genes was largely unchanged (Figures 3D and S3A). Nur77-dependent regulation of IDH-encoding genes was further confirmed by the overexpression of human Nur77 in Nur77-KO BMDMs, which resulted in the significantly reduced expression of mitochondrial IDH isoforms *Idh2*, *Idh3b*, and *Idh3g*, but not the cytosolic IDH isoform *Idh1* (Figure S3B).

We hypothesized that a failure to downregulate IDH expression in response to LPS could lead to aberrantly high TCA cycle activity in pro-inflammatory Nur77-KO BMDMs. To test this hypothesis, we measured the abundance of succinate, a pro-inflammatory TCA cycle intermediate formed downstream of IDH that accumulates during inflammation (Ryan and O'Neill, 2017). Consistent with their increased IDH expression, pro-inflammatory Nur77-KO BMDMs expressed higher levels of intracellular succinate and increased secretion of this metabolite into the extracellular environment (Figure 3E).

**Pro-inflammatory Nur77-Deficient Macrophages Show Enhanced TCA Cycle Activity**

We next investigated possible Nur77-induced changes in TCA cycle metabolism by performing metabolomic profiling of WT and Nur77-KO BMDMs using liquid chromatography-mass

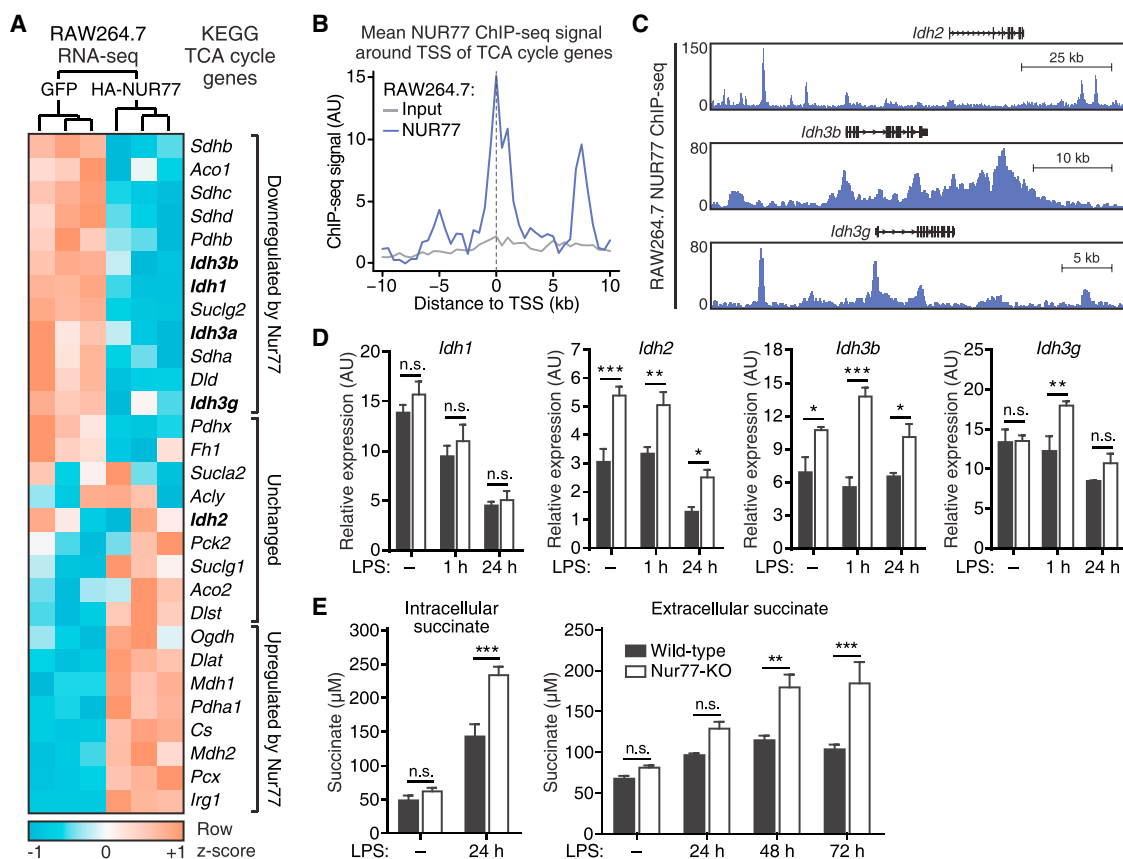

**Figure 3. Nur77-Deficient Macrophages Fail to Downregulate IDH Expression and Accumulate Higher Levels of Succinate during Inflammation**

(A) Hierarchical clustering and expression heatmap of TCA cycle enzyme-encoding genes in RAW264.7 after inducible overexpression of GFP or HA-NUR77, as determined by RNA-seq.

(B) Mean Nur77 ChIP-seq signal in RAW264.7 in 20 kb window around transcription start sites (TSSs) of TCA cycle genes shown in (A).

(C) Genome browser view of Nur77 ChIP-seq signal around isocitrate dehydrogenase (IDH) gene loci in RAW264.7 macrophages.

(D and E) Gene expression of cytosolic and mitochondrial IDH isoforms (D) and succinate levels (E) in WT and Nur77-KO BMDMs left untreated or stimulated with LPS for the times indicated.

For (D) and (E), data are shown as means  $\pm$  SEMs ( $n = 3$ ).  $p$  values were calculated using two-tailed Student's  $t$  test. n.s., non-significant. \* $p < 0.05$ , \*\* $p < 0.01$ , \*\*\* $p < 0.001$ .

See also Figure S3.

spectrometry (LC-MS). We found that WT and Nur77-KO BMDMs were metabolically similar at baseline but altered their metabolism in different ways in response to LPS (Figure 4A; Table S2). Random forest analysis showed that the differences between WT and Nur77-KO BMDMs were primarily caused by an altered abundance of  $\alpha$ -ketoglutarate, glutamate, and succinate—three closely connected metabolites, the first of which is produced by IDH (Figure 4B). Similarly, separate random forest analyses of LPS-induced changes in WT and Nur77-KO BMDMs showed that WT cells primarily changed their levels of succinate,  $\alpha$ -ketoglutarate, and glycolysis-related metabolites in response to LPS, while Nur77-KO cells primarily changed their abundance of succinate and several amino acids, but notably not  $\alpha$ -ketoglutarate (Figure 4B). A closer look at the metabolomics dataset revealed that Nur77-KO BMDMs express significantly higher levels of IDH-derived  $\alpha$ -ketoglutarate and downstream TCA

cycle intermediates in response to LPS, while producing lower levels of lactate, possibly because of the increased demand for pyruvate entry into the TCA cycle (Figure 4C). In addition, Nur77-KO BMDMs had a significantly lower (iso)citrate-to- $\alpha$ -ketoglutarate ratio after LPS stimulation, which is indicative of increased IDH activity in these cells (Figure 4D).

We wondered what functional consequences high IDH activity in pro-inflammatory Nur77-KO macrophages could have. Downregulation of IDH in pro-inflammatory macrophages results in a TCA cycle break that is partially alleviated by the enhanced conversion of glutamine to  $\alpha$ -ketoglutarate (anaplerosis), which is then converted to succinate (Jha et al., 2015). We therefore speculated that enhanced IDH activity in LPS-stimulated Nur77-KO BMDMs may lead to a reduced dependence on glutamine for succinate production. LPS-induced succinate accumulation was completely inhibited when WT BMDMs were cultured

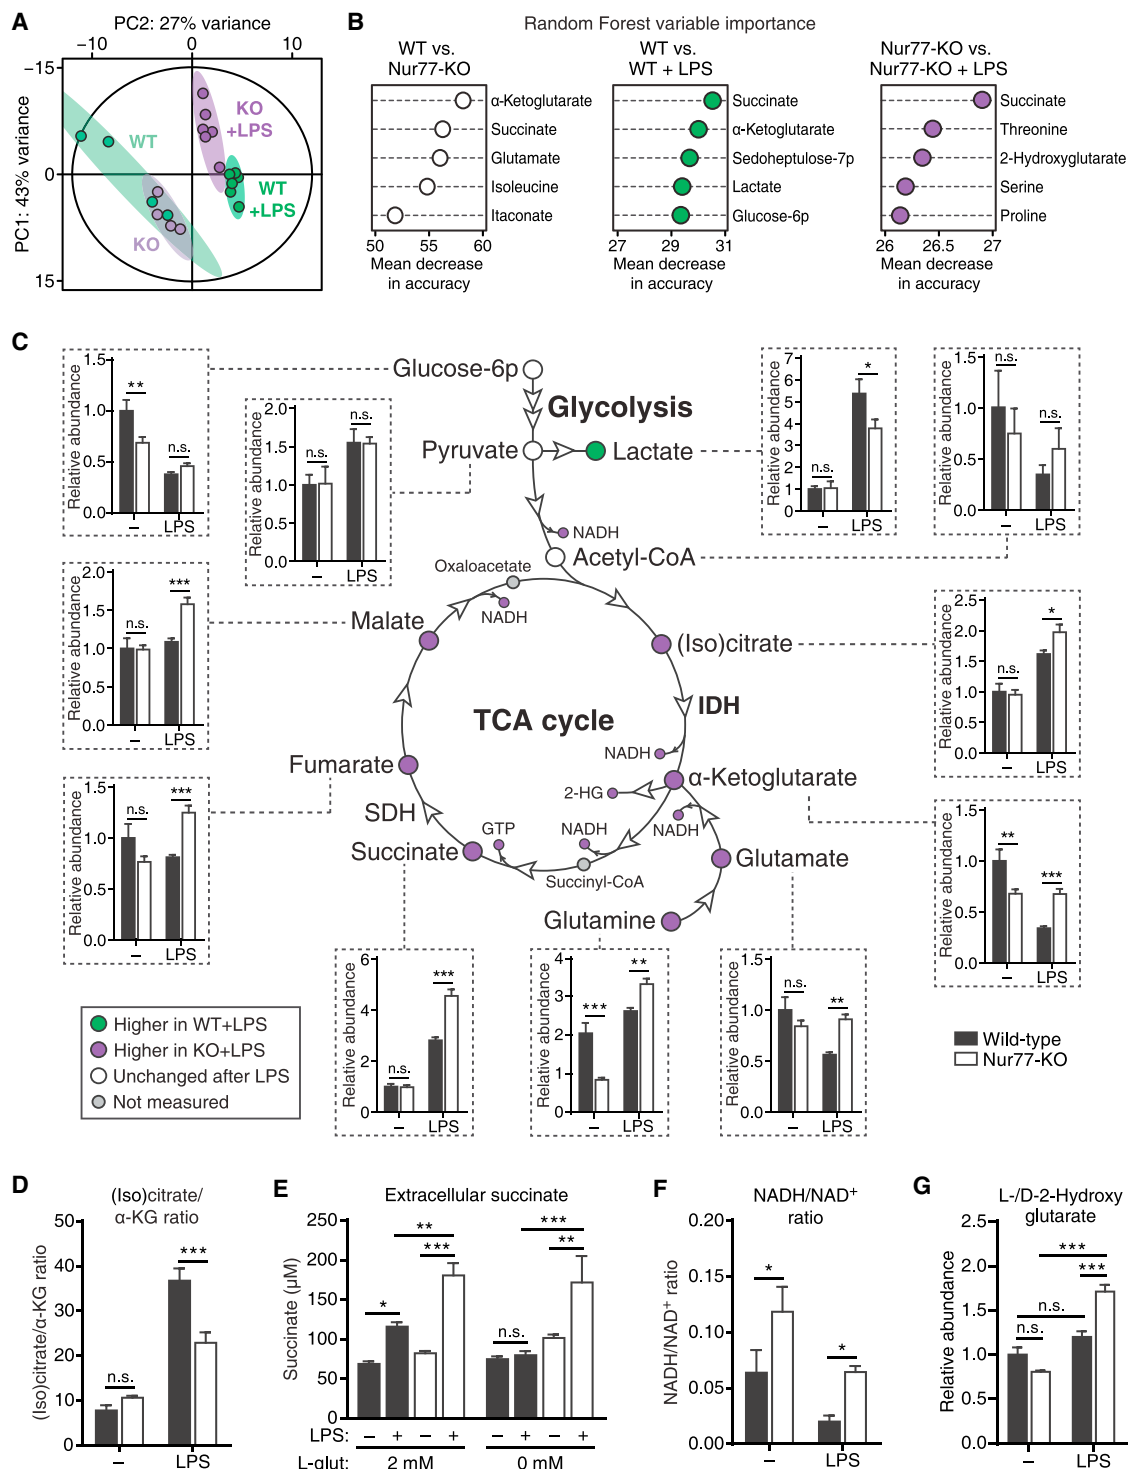

**Figure 4. Pro-inflammatory Nur77-Deficient Macrophages Show Enhanced TCA Cycle Activity**

(A and B) Principal-component analysis (PCA) (A) and random forest variable importance measures (B) of intracellular metabolite levels from untreated ( $n = 4$  per group) or 24 hr LPS-treated ( $n = 6$  per group) WT and Nur77-KO BMDMs, as determined by LC-MS (metabolomics).

(C) TCA cycle schematic summarizing metabolomics. Circles indicate metabolites, arrowheads indicate enzymes. Node colors indicate relative metabolite abundance, as shown in the lower left corner. Insets connected by dotted lines show relative metabolite abundance for untreated (-) and 24 hr LPS-treated groups. 2-HG, 2-hydroxyglutarate; IDH, isocitrate dehydrogenase; SDH, succinate dehydrogenase.

(D) Ratio of (iso)citrate to  $\alpha$ -ketoglutarate abundance in WT and Nur77-KO BMDMs from metabolomics.

(legend continued on next page)

in glutamine-free medium, while succinate levels were unaffected by glutamine availability in Nur77-KO BMDMs (Figure 4E).

Taken together, these results strongly suggest there is increased IDH and TCA cycle activity in pro-inflammatory Nur77-KO macrophages. This idea was further supported by a significantly higher NADH:NAD<sup>+</sup> ratio in pro-inflammatory Nur77-KO BMDMs (Figure 4F), which is consistent with the enhanced reduction of NAD<sup>+</sup> by an overly active TCA cycle and reduced consumption of NADH by the ETC as a result of suppressed OXPHOS. Similarly, Nur77-KO BMDMs—but not WT BMDMs—accumulated 2-hydroxyglutarate (L- and D- forms) in response to LPS (Figures 4B and 4G). L-2-Hydroxyglutarate is a dead-end metabolite that is used by cells to regenerate NAD<sup>+</sup> in response to rising  $\alpha$ -ketoglutarate and NADH levels. Similar to succinate, it can stabilize the pro-inflammatory transcription factor HIF-1 $\alpha$  (Oldham et al., 2015). In summary, these results demonstrate that Nur77 deficiency leads to increased TCA cycle activity and pro-inflammatory metabolite production in activated macrophages.

#### Nur77 Deficiency Enhances SDH Activity in Pro-inflammatory Macrophages

Nur77-KO BMDMs accumulate higher levels of succinate in response to LPS. Increased succinate levels could also be caused by a decrease in downstream succinate oxidation by SDH, however, especially because Nur77-KO BMDMs showed an increased abundance of the SDH-inhibitory metabolite itaconate and *Irg1*, the enzyme responsible for its production (Figures S4A and S4B) (Lampropoulou et al., 2016). Pro-inflammatory Nur77-KO BMDMs also produced more SDH-derived fumarate (Figure 4C). We therefore sought to clarify whether SDH activity is altered in Nur77-KO BMDMs. We measured oxygen consumption of cells treated with compounds that force mitochondrial respiration to occur exclusively via SDH (Salabei et al., 2014) and found that Nur77-KO BMDMs had a higher SDH-mediated respiration after LPS stimulation (Figure 5A). We also measured the reduction of 3-(4,5-dimethylthiazol-2-yl)-2,5-diphenyltetrazolium bromide (MTT) to formazan, a common assay for SDH activity (Van den Bossche et al., 2016), which showed that Nur77-KO BMDMs had higher levels of SDH activity after LPS stimulation. Treating cells with the SDH inhibitor dimethyl malonate (DMM) reduced SDH activity to levels comparable to those of WT (Figure 5B). Increased SDH activity in Nur77-KO BMDMs was not caused by a higher overall viability of these cells, however, because intracellular ATP levels, a measure of cell viability, were higher in WT cells (Figure S5A). Finally, a similar increase in SDH activity was observed in Nur77-depleted RAW264.7 macrophages (Figure S5B).

We hypothesized that Nur77 altered SDH activity by regulating the expression of SDH-encoding genes, because all four SDH

subunits were downregulated by Nur77 overexpression in the RAW264.7 RNA-seq dataset (Figure 3A; Table S1). However, gene expression of all SDH subunits and protein expression of the SDH subunit A were unchanged in Nur77-KO BMDMs (Figures S3A and S5C). Taken together, these results show that elevated levels of succinate in pro-inflammatory Nur77-KO BMDMs are most likely caused by an increase in its production by upstream enzymes of the TCA cycle and not by a decrease in its conversion by SDH.

#### Nur77 Deficiency Increases Mitochondrial Membrane Potential, ROS Production, and SDH-Mediated HIF-1 $\alpha$ Stabilization in Pro-inflammatory Macrophages

Succinate accumulates in activated macrophages and potentiates the inflammatory response by increasing SDH-facilitated mitochondrial ROS production, which in turn leads to stabilization of the pro-inflammatory transcription factor HIF-1 $\alpha$  (Mills et al., 2016). Mitochondrial ROS is primarily produced by complex I of the ETC, which couples oxidation of TCA cycle-derived NADH with reduction of coenzyme Q (CoQ). ROS production by complex I is highest under two conditions: (1) when the NADH:NAD<sup>+</sup> ratio is high (i.e., too much input), or (2) when the proton-motive force ( $\Delta p$ ) is high, the rate of OXPHOS is low, and the CoQ pool is highly reduced (i.e., less potential output) (Murphy, 2009). Pro-inflammatory macrophages fulfill all three parameters of the second condition because they have low rates of OXPHOS, high rates of succinate-driven reduction of CoQ via SDH, and elevated mitochondrial membrane potential ( $\Delta\psi_m$ , a component of  $\Delta p$ ) (Ryan and O'Neill, 2017).

Because Nur77-KO BMDMs showed elevated levels of succinate, increased SDH activity, and a relatively higher NADH:NAD<sup>+</sup> ratio, we hypothesized that these cells would suffer from exacerbated SDH-driven increases in  $\Delta\psi_m$  and ROS production. We found that a larger proportion of Nur77-KO BMDMs had hyperpolarized mitochondria compared to WT BMDMs after LPS stimulation (Figures 5C and S5D), which also translated into higher median accumulation of the same  $\Delta\psi_m$ -sensitive probe in the mitochondria of Nur77-KO BMDMs (Figure 5D). In addition, Nur77-KO BMDMs produced higher levels of both mitochondrial and whole-cell (total) ROS in response to LPS (Figures 5E and 5F). Similar results were obtained using Nur77-depleted RAW264.7 macrophages (Figure S5E). The increased ROS levels observed in Nur77-KO BMDMs were not caused by defective ROS scavenging, however, because there were no differences in the ratio of oxidized to reduced glutathione between WT and Nur77-KO BMDMs (Figure S5F), while the total pool of this endogenous antioxidant was actually increased in Nur77-KO BMDMs (Figure S5G). Finally, in line with their enhanced ROS, 2-hydroxyglutarate, and succinate production, Nur77-KO BMDMs expressed higher levels of HIF-1 $\alpha$  protein after LPS

(E) Succinate secretion by WT and Nur77-KO BMDMs cultured in glutamine-containing (2 mM) or glutamine-free (0 mM) medium and either left untreated (–) or stimulated with LPS for 48 hr (+).

(F and G) Ratio of reduced (NADH) to oxidized (NAD<sup>+</sup>) nicotinamide adenine dinucleotide (F) and total 2-hydroxyglutarate (L- and D- forms) abundance (G) in WT and Nur77-KO BMDMs from metabolomics.

For (C)–(G), data are shown as means  $\pm$  SEMs (n = 3 for [E]; n = 4–6 for [C], [D], [F], and [G]). p values were calculated using two-tailed Student's t test (B, C, F, and H–J) or two-way ANOVA with Tukey's post hoc test (E). n.s., non-significant. \*p < 0.05, \*\*p < 0.01, \*\*\*p < 0.001.

See also Figure S4.



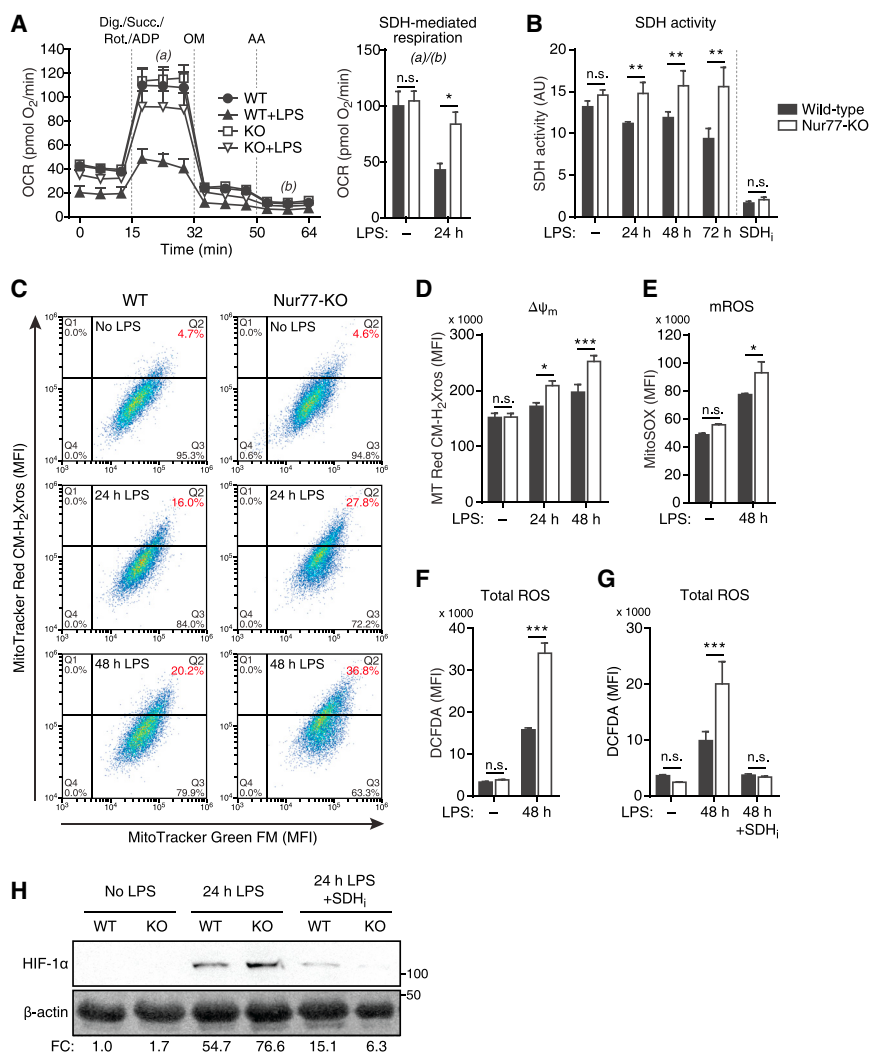

**Figure 5. Nur77 Deficiency Increases SDH Activity, Mitochondrial Membrane Potential, ROS Production, and SDH-Induced HIF-1 $\alpha$  Stabilization in Pro-inflammatory Macrophages**

(A) OCR in WT and Nur77-KO BMDMs left untreated or stimulated with LPS for 24 hr, followed by sequential injections of digitonin (Dig.), succinate (Succ.), rotenone (Rot.), and ADP in the first, OM in the second, and AA in the third injection. Bar graph shows SDH activity derived by dividing OCR at (a) by that at (b).

(B) SDH activity determined by MTT assay in WT and Nur77-KO BMDMs left untreated, stimulated with LPS for times indicated, or treated with SDH inhibitor DMM for 24 hr (SDH<sub>i</sub>).

(C) Flow cytometry dot plots of  $\Delta\psi_m$ -insensitive MitoTracker Green FM (x axis) and  $\Delta\psi_m$ -sensitive MitoTracker Red CM-H<sub>2</sub>Xros (y axis) fluorescence in WT and Nur77-KO BMDMs left untreated or stimulated with LPS for the times indicated. Cells in quadrant Q2 were considered to have hyperpolarized mitochondria.

(D)  $\Delta\psi_m$  determined by flow cytometry in WT and Nur77-KO BMDMs left untreated or stimulated with LPS for the times indicated and stained with MitoTracker Red CM-H<sub>2</sub>Xros.

(E–G) Mitochondrial reactive oxygen species (mROS) (E) and total ROS production (F and G) determined by flow cytometry in WT and Nur77-KO BMDMs left untreated or stimulated with LPS for 24 hr with and without SDH inhibitor NPA pre-treatment (SDH<sub>i</sub>).  $\beta$ -Actin was used as loading control. Numbers on the right: molecular weight in kDa; numbers at the bottom: fold change (FC) in  $\beta$ -actin-normalized HIF-1 $\alpha$  band intensity relative to unstimulated WT. The blot shown is representative of two independent experiments. For (A), (B), and (D)–(F), data are shown as means  $\pm$  SEMs (n = 4 for [A] and [D]; n = 8 for [B], n = 3 for [E] and [F]). p values were calculated using two-tailed Student's t test. n.s., non-significant. \*p < 0.05, \*\*p < 0.01, \*\*\*p < 0.001.

See also [Figure S5](#).

stimulation, while pre-treating cells with the SDH inhibitor nitropropionic acid (NPA) completely abrogated this effect ([Figure 5G](#)). Taken together, these results show that Nur77 deficiency leads to increased mitochondrial membrane hyperpolarization, ROS production, and SDH-mediated HIF-1 $\alpha$  stabilization in response to LPS.

### Pro-inflammatory Nur77-KO Macrophages Produce More Cytokines in an SDH-Dependent Manner

In pro-inflammatory macrophages, SDH-mediated stabilization of HIF-1 $\alpha$  leads to the increased production of several pro-inflammatory cytokines, with the notable exception of TNF- $\alpha$  ([Lampropoulou et al., 2016](#); [Mills et al., 2016](#)). Consistent with our previous results, Nur77-KO BMDMs expressed higher levels of several genes encoding SDH-regulated pro-inflammatory cytokines, including *Il1b*, *Il6*, *Il12a*, *Il12b*, and *Il18* ([Figures 6A](#) and [6D](#)). Meanwhile, expression of the anti-inflammatory cyto-

kine *Il10* was decreased, while expression of pro-inflammatory *Tnf* was unchanged in Nur77-KO BMDMs ([Figure 6A](#)). Overexpression of human Nur77 in Nur77-KO BMDMs led to significantly reduced expression levels of *Il1b* and *Il6*, but not *Tnf* ([Figure S6A](#)). Correspondingly, protein expression of the cytokines IL-6, IL-12p70, and IL-1 $\beta$  were higher in LPS-treated Nur77-KO BMDMs, while IL-10 protein was lower and TNF- $\alpha$  protein was unchanged ([Figures 6B](#) and [6C](#)). Treating cells with the SDH inhibitor NPA normalized the protein expression of all of the above-mentioned cytokines between WT and Nur77-KO BMDMs ([Figures 6B](#) and [6C](#)). Nur77-KO BMDMs also induced the expression of the succinate receptor *Sucnr1* (GPR91) and the pro-inflammatory cytokines *Il18* and interferon (IFN)- $\gamma$  in response to LPS stimulation, whereas WT BMDMs did not ([Figures 6D](#) and [6E](#)). Taken together, these results show that the increased production of pro-inflammatory cytokines in Nur77-KO BMDMs is mainly the result of increased SDH activity in these cells.

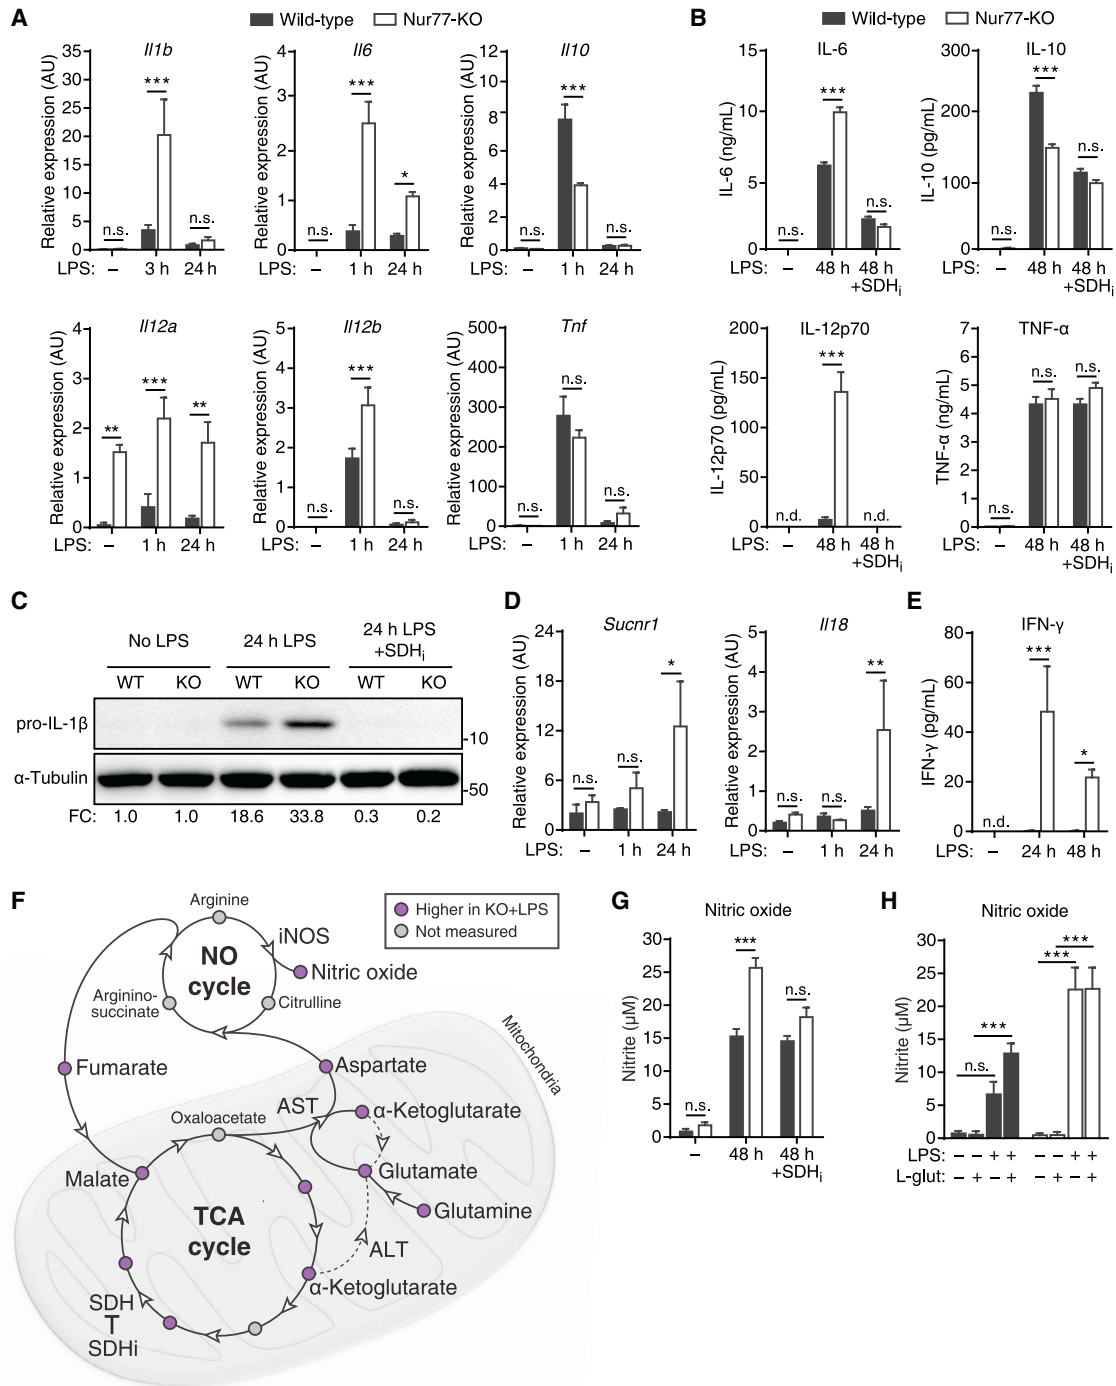

**Figure 6. Nur77-Deficient Macrophages Produce More Pro-inflammatory Cytokines and NO in an SDH-Dependent Manner**

(A and B) Cytokine gene expression (A) and protein secretion (B) in WT and Nur77-KO BMDMs left untreated or stimulated with LPS for times indicated with and without SDH inhibitor NPA pre-treatment (SDH<sub>i</sub>).

(C) Western blot for pro-IL-1β protein in WT and Nur77-KO BMDMs left untreated or stimulated with LPS for 24 hr with and without NPA pre-treatment (SDH<sub>i</sub>). α-Tubulin was used as loading control. Numbers on the right: molecular weight in kDa. Numbers at the bottom: fold change in α-tubulin-normalized pro-IL-1β band intensity relative to unstimulated WT. Blot shown is representative of two independent experiments.

(D and E) *Il18* and *Sucnr1* gene expression (D) and IFN-γ secretion (E) in WT and Nur77-KO BMDMs left untreated or stimulated with LPS for the times indicated. (F) Schematic of TCA and NO cycles connected by the aspartate-argininosuccinate shunt. Circles indicate metabolites; arrowheads indicate enzymes. Node colors indicate metabolite abundance from metabolomics, as shown in the upper right corner. AST, aspartate aminotransferase; ALT, alanine aminotransferase; iNOS, inducible NO synthase; SDH, succinate dehydrogenase. Dashed line indicates α-ketoglutarate-consuming, glutamate-forming reaction of ALT.

(legend continued on next page)

### Altered TCA Cycle Metabolism Enhances Nitric Oxide Production in Pro-inflammatory Nur77-KO Macrophages

In addition to cytokines, pro-inflammatory macrophages produce large amounts of nitric oxide (NO), a molecule used to both attack pathogens and remodel intracellular metabolism (Van den Bossche et al., 2016). Nur77-KO BMDMs secreted larger amounts of NO in response to LPS (Figure S6B), even though both gene and protein expressions of inducible NO synthase (iNOS)—the enzyme responsible for LPS-induced NO production in mouse macrophages—were essentially unchanged between WT and Nur77-KO BMDMs (Figures S6C and S6D).

These observations led us to hypothesize that Nur77-KO BMDMs produce larger amounts of NO because of their altered TCA cycle metabolism. NO production in macrophages is supported by the aspartate-argininosuccinate shunt, which connects the TCA and NO cycles via aspartate aminotransferase (AST; *Got2*) (Jha et al., 2015). AST consumes TCA cycle-derived oxaloacetate and glutamine-derived glutamate to produce aspartate, which is then fed into the NO cycle (Figure 6F). Consistent with this model, reducing oxaloacetate availability by blocking TCA cycle activity at SDH decreased NO production in Nur77-KO BMDMs to levels comparable to those of WT BMDMs (Figure 6G). Furthermore, steady-state levels of glutamine, glutamate, and aspartate were found to be higher in LPS-treated Nur77-KO BMDMs (Figures 4C and S6E), potentially because of the reduced need by these cells to use glutamine and glutamate for TCA cycle anaplerosis. Finally, culturing cells in glutamine-free medium severely hampered the ability of WT BMDMs to produce NO in response to LPS, while NO production in Nur77-KO BMDMs was unaffected (Figure 6H). In summary, these results show that increased NO production in Nur77-KO BMDMs is primarily caused by their highly active TCA cycle metabolism.

### Bone Marrow Nur77 Deficiency Exacerbates Western-type Diet-Induced Atherosclerotic Lesion Development, Circulating Succinate Accumulation, and Lesion HIF-1 $\alpha$ Protein *In Vivo*

Given the enhanced SDH-driven inflammatory response in Nur77-KO BMDMs, we hypothesized that Nur77 deficiency leads to exacerbated inflammation *in vivo*. A number of studies by our group and others have shown that Nur77 has a protective effect in atherosclerosis (Hamers et al., 2012; Hanna et al., 2012; Hu et al., 2014), a chronic inflammatory disease driven in large part by macrophage-mediated inflammation (Moore and Tabas, 2011). However, others have reported that a lack of Nur77 does not affect atherosclerosis development, and it was suggested by the authors that this discrepancy may be the result of mouse stock-specific differences in genomic background (Chao et al., 2013). We therefore decided to re-evaluate the role of Nur77 in atherosclerosis using a newly developed Nur77-deficient mouse line created with the cytomegalovirus (CMV) promoter-driven

Cre-Lox system. Bone marrow from these Nur77-deficient mice, which did not express Nur77 (Figure S7A), or from WT littermates was transplanted into *Ldlr*<sup>-/-</sup> mice, followed by a Western-type diet (WTD) feeding to induce atherosclerotic lesion formation. After 14 weeks of WTD, mice that received a Nur77-KO bone marrow transplant (KO-tp) developed significantly larger atherosclerotic lesions than did mice that received WT bone marrow (WT-tp) (Figure 7A). In addition, lesions in KO-tp mice had significantly larger necrotic areas (Figure 7A), a hallmark of a more advanced disease stage (Moore and Tabas, 2011). Further analysis of atherosclerotic lesion composition showed that collagen and macrophage content was unchanged, while smooth muscle cell, T cell, and apoptotic cell counts were increased in KO-tp mice (Figure S7B). We found that blood inflammatory cytokine and succinate levels were increased in response to 14 weeks of WTD and that the accumulation of circulating IL-6, IFN- $\gamma$ , and succinate was further increased in KO-tp mice (Figures 7B and 7C). Consistent with increased levels of circulating succinate and inflammatory cytokines, we found that HIF-1 $\alpha$  protein was more highly expressed in atherosclerotic lesions of KO-tp mice (Figure 7D).

## DISCUSSION

Rewiring of TCA cycle metabolism and activation of various metabolic shunt pathways is required for the efficient production of inflammatory effector molecules by activated macrophages (Ryan and O'Neill, 2017). The upstream regulators responsible for these inflammation-induced metabolic adaptations are not known, however. Here, we show that the anti-inflammatory activity of Nur77 in macrophages is primarily mediated by its ability to alter mitochondrial metabolism, in addition to its previously reported function as a repressor of NF- $\kappa$ B signaling. Furthermore, our results show that even though changes in TCA cycle metabolism are induced by inflammatory stimuli, they actually serve to limit the inflammatory response in macrophages.

The first step in the resolution of inflammation is a timely termination of pro-inflammatory signaling (Serhan and Savill, 2005). It is therefore particularly interesting that Nur77-KO macrophages possess the ability to produce pro-inflammatory molecules such as succinate and NO under conditions of glutamine restriction, a metabolite whose importance in promoting endotoxin tolerance in macrophages has recently appreciated (Liu et al., 2017). Although the exact cause of their glutamine independence is not clear, we hypothesize that Nur77-KO macrophages can maintain succinate and NO production in glutamine-restricted conditions because of their larger reservoir of IDH-derived  $\alpha$ -ketoglutarate. This metabolite can be converted to either succinate via the TCA cycle or to glutamate—and subsequently aspartate—via alanine aminotransferase (ALT), the mitochondrial isoform of which (*Gpt2*) works mainly in the  $\alpha$ -ketoglutarate-consuming, glutamate-forming direction (Gubern et al., 1990).

(G and H) NO secretion by WT and Nur77-KO BMDMs left untreated (–) or stimulated with LPS for 48 hr with and without NPA pre-treatment (SDH) (G), or cultured in glutamine-free (–) or 2 mM glutamine (L-glut)-containing (+) medium and left untreated (–) or stimulated with LPS for 48 hr (+) (H).

For (A), (B), (D), (E), (G), and (H), data are shown as means  $\pm$  SEMs (n = 3). p values were calculated using two-tailed Student's t test (A, B, D, E, and G) or two-way ANOVA with Tukey's post hoc test (H). n.s., non-significant. \*p < 0.05, \*\*p < 0.01, \*\*\*p < 0.001.

See also Figure S6.

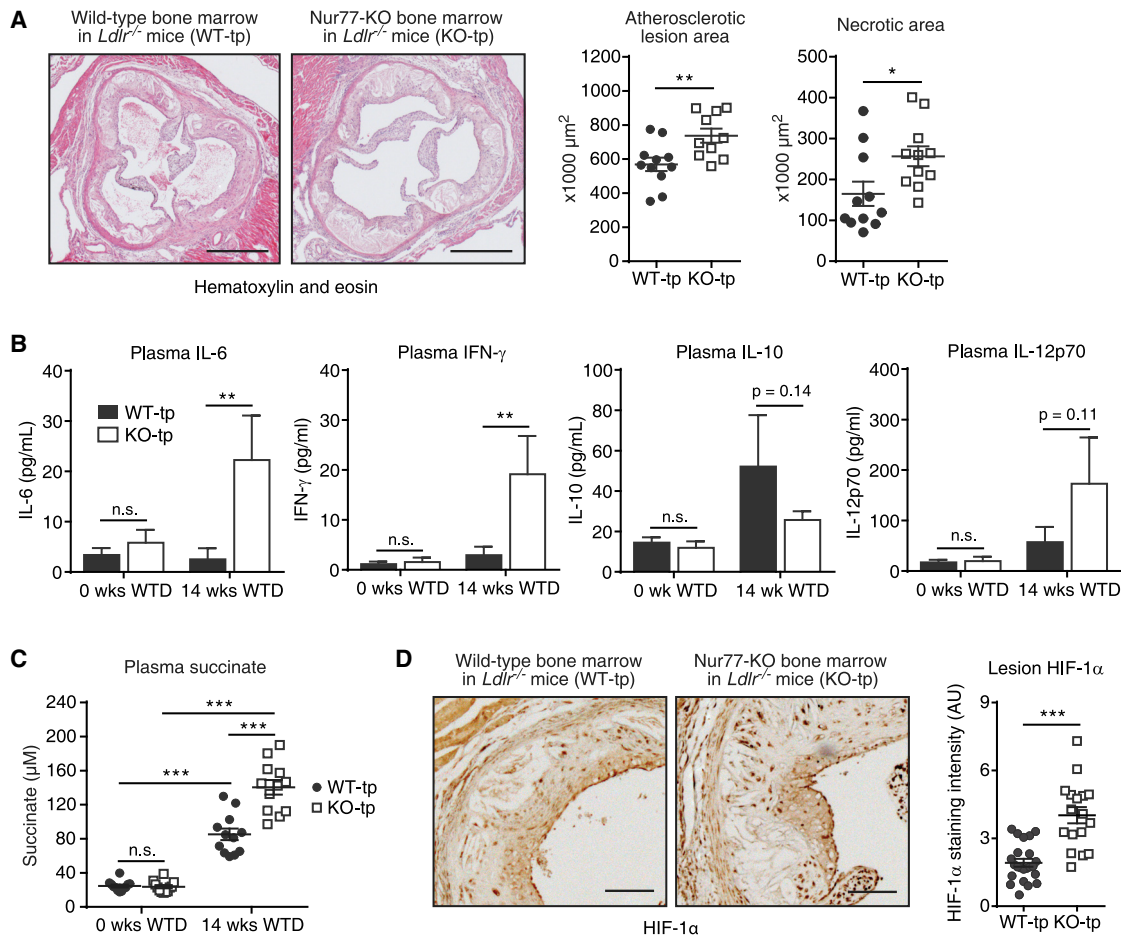

**Figure 7. Bone Marrow Nur77 Deficiency Exacerbates Western-type Diet-Induced Atherosclerotic Lesion Development, Circulating Succinate Accumulation, and Lesion HIF-1 $\alpha$  Protein *In Vivo***

(A) Representative micrographs of H&E-stained atherosclerotic lesions in *Ldlr*<sup>-/-</sup> mice that received WT (WT-tp) or Nur77-deficient (KO-tp) bone marrow and were subsequently fed a Western-type diet (WTD) for 14 weeks. Scale bar indicates 1 mm. Scatterplots on the right: quantifications of atherosclerotic lesion size (left) and lesional necrotic area (right).

(B and C) Cytokine protein (B) and succinate (C) levels in blood plasma of mice described in (A).

(D) Representative micrographs of HIF-1 $\alpha$  immunohistochemical staining in atherosclerotic lesions from mice described in (A). Scale bar indicates 0.25 mm. Scatterplot on the right: quantification of lesion HIF-1 $\alpha$  staining.

For (A), (C), and (D), each filled circle (WT-tp) or hollow square (KO-tp) indicates one mouse, and horizontal bars indicate means  $\pm$  SEMs. For (B), data are shown as means  $\pm$  SEMs ( $n = 10$ ).  $p$  values were calculated using two-tailed Student's  $t$  test (A and D) or two-way ANOVA (B and C). n.s., non-significant. \* $p < 0.05$ , \*\* $p < 0.01$ , \*\*\* $p < 0.001$ .

Two recent publications have reported that Nur77 silencing or pharmacological inhibition leads to increased gene expression of cytoplasmic IDH (*Idh1*) in various cancer cell lines (Hedrick et al., 2015; Lee et al., 2014). Although the exact cause of the discrepancy in *Idh1* regulation between these studies and our RAW264.7 RNA-seq dataset showing reduced *Idh1* expression in response to Nur77 overexpression was not studied in more detail, we speculate that it may be the result of cell-type-specific *Idh1* regulation or differences between Nur77 overexpression and inhibition or silencing. It should be noted, however, that these studies do not report on the effects of Nur77 modulation on mitochondrial IDH (*Idh2*, *Idh3*) expression, which we found to be significantly lower in Nur77-KO macrophages.

Nur77-KO macrophages express higher levels of the pro-inflammatory cytokines IL-18 and IFN- $\gamma$  in response to LPS, while WT macrophages do not. Such aberrant cytokine expression could be further exacerbated by increased autocrine signaling because IFN- $\gamma$  stimulates the production of IL-12 by macrophages (Hayes et al., 1995), while efficient production of IFN- $\gamma$  by these cells in turn is said to occur only in response to combined stimulation with IL-12 and IL-18 (Munder et al., 1998). All three of these cytokines are expressed more highly in Nur77-KO macrophages, suggesting the activation of an autocrine feedback loop that is inhibited in WT macrophages under the conditions tested here. A similar autocrine signaling loop involving extracellular succinate and the succinate receptor GPR91 could also occur, as activation of GPR91 by succinate



enhances the inflammatory response of macrophages (Littlewood-Evans et al., 2016). Nur77-KO macrophages secrete more succinate and express higher levels of the GPR91-encoding gene *Sucnr1*. Because GPR91 senses extracellular succinate but does not internalize it, future research could focus on the relative contribution of intracellular versus extracellular succinate to the macrophage inflammatory response.

*In vivo* we found that Nur77 deficiency aggravates progression of the chronic inflammatory disease atherosclerosis and leads to increased circulating succinate levels, most likely because of the enhanced succinate and cytokine production of Nur77-KO macrophages. The potential consequences of increased circulating succinate levels should not be underestimated, as activation of the ubiquitously expressed succinate receptor GPR91 has been implicated in a wide variety of inflammation-driven diseases in both mice and humans (Ariza et al., 2012). Circulating succinate can therefore be thought of as a danger signal, the elevation of which could pave the way for a plethora of other inflammation-driven pathologies. Aged Nur77-deficient mice suffer from spontaneous, insult-free systemic inflammation (Li et al., 2015b), and Nur77 deficiency is detrimental in a variety of other inflammation-associated diseases, such as LPS-induced sepsis (Li et al., 2015a), diabetes (Chao et al., 2009), and myocardial infarction (Hilgendorf et al., 2014). Succinate signaling and metabolism have been shown to aggravate the progression of all three of these diseases (Chouchani et al., 2014; van Diepen et al., 2017; Mills et al., 2016), suggesting the involvement of Nur77-based restriction of succinate signaling in these diseases.

In conclusion, our work shows that Nur77 limits inflammation in pro-inflammatory macrophages by regulating TCA cycle remodeling. As a negative regulator of both NF- $\kappa$ B signaling and SDH-driven inflammation in macrophages, Nur77 is proposed as an attractive therapeutic target for the treatment of atherosclerosis and other chronic inflammatory diseases.

## STAR★METHODS

Detailed methods are provided in the online version of this paper and include the following:

- **KEY RESOURCES TABLE**
- **CONTACT FOR REAGENT AND RESOURCE SHARING**
- **EXPERIMENTAL MODEL AND SUBJECT DETAILS**
  - Mouse strains
  - Bone marrow transplantation and atherosclerosis progression
  - Bone marrow-derived macrophage (BMDM) differentiation and cell culture
  - RAW264.7 macrophage cell culture
- **METHOD DETAILS**
  - Lentiviral transductions
  - RNA sequencing (RNA-seq)
  - Chromatin immunoprecipitation sequencing (ChIP-seq)
  - Quantitative PCR (qPCR)
  - SDS-PAGE and western blotting
  - Immunofluorescence microscopy

- Oxygen consumption and lactate production (Sea-horse) assays
- Determination of ATP levels
- Determination of mitochondrial and lysosomal abundance and co-localization
- Determination of intracellular metabolite abundance by LC-MS (metabolomics)
- SDH activity assays
- Determination of mitochondrial membrane potential and reactive oxygen species (ROS) production by flow cytometry
- Determination of nitric oxide (NO), cytokine, and succinate secretion
- **QUANTIFICATION AND STATISTICAL ANALYSIS**
  - Statistical analysis
  - Analysis of RNA-seq data
  - Analysis of ChIP-seq data
- **DATA AND SOFTWARE AVAILABILITY**
  - Data resources

## SUPPLEMENTAL INFORMATION

Supplemental Information includes seven figures, three tables, and one video and can be found with this article online at <https://doi.org/10.1016/j.celrep.2018.07.065>.

## ACKNOWLEDGMENTS

We thank Jessica Nelson and Marten Hoeksema for discussion and technical assistance. This research was supported by a grant from the Netherlands CardioVascular Research Initiative (CVON2011-19 “GENIUS”). N.Z. is supported by a European Research Council Consolidator grant (617376). E.K. is supported by a Dutch Diabetes Foundation grant (2009.60.003). J.V.d.B. is supported by a ZonMW (the Netherlands Organisation for Health Research and Development) VENI grant (91615052) and Netherlands Heart Foundation Junior Postdoc (2013T003) and Netherlands Heart Foundation Senior Postdoc (2017T048) grants. S.H. is supported by a ZonMW VIDJ grant (016.156.327).

## AUTHOR CONTRIBUTIONS

D.S.K., E.K., and C.J.d.V. conceived the study and experiments. D.S.K., I.J.E.-v.G., L.M., P.B.v.L., M.v.W., M.V., and S.H. performed the experiments. D.S.K., Y.K., L.W., and W.Z. performed and analyzed the high throughput sequencing (HTSeq) experiments. D.S.K. and C.J.d.V. wrote the manuscript. J.V.d.B., D.S., N.Z., W.Z., and E.K. provided expertise and feedback.

## DECLARATION OF INTERESTS

The authors declare no competing interests.

Received: September 27, 2017

Revised: April 20, 2018

Accepted: July 18, 2018

Published: August 21, 2018

## REFERENCES

- Anders, S., Pyl, P.T., and Huber, W. (2015). HTSeq—a Python framework to work with high-throughput sequencing data. *Bioinformatics* 31, 166–169.
- Ariza, A.C., Deen, P.M.T., and Robben, J.H. (2012). The succinate receptor as a novel therapeutic target for oxidative and metabolic stress-related conditions. *Front. Endocrinol. (Lausanne)* 3, 22.

- Bonta, P.I., van Tiel, C.M., Vos, M., Pols, T.W.H., van Thienen, J.V., Ferreira, V., Arkenbout, E.K., Seppen, J., Spek, C.A., van der Poll, T., et al. (2006). Nuclear receptors Nur77, Nurr1, and NOR-1 expressed in atherosclerotic lesion macrophages reduce lipid loading and inflammatory responses. *Arterioscler. Thromb. Vasc. Biol.* *26*, 2288–2294.
- Chao, L.C., Wroblewski, K., Zhang, Z., Pei, L., Vergnes, L., Ilkayeva, O.R., Ding, S.Y., Reue, K., Watt, M.J., Newgard, C.B., et al. (2009). Insulin resistance and altered systemic glucose metabolism in mice lacking Nur77. *Diabetes* *58*, 2788–2796.
- Chao, L.C., Soto, E., Hong, C., Ito, A., Pei, L., Chawla, A., Conneely, O.M., Tangirala, R.K., Evans, R.M., and Tontonoz, P. (2013). Bone marrow NR4A expression is not a dominant factor in the development of atherosclerosis or macrophage polarization in mice. *J. Lipid Res.* *54*, 806–815.
- Chouchani, E.T., Pell, V.R., Gaude, E., Aksentijević, D., Sundier, S.Y., Robb, E.L., Logan, A., Nadtochiy, S.M., Ord, E.N.J., Smith, A.C., et al. (2014). Ischaemic accumulation of succinate controls reperfusion injury through mitochondrial ROS. *Nature* *515*, 431–435.
- Dolman, N.J., Chambers, K.M., Mandavilli, B., Batchelor, R.H., and Janes, M.S. (2013). Tools and techniques to measure mitophagy using fluorescence microscopy. *Autophagy* *9*, 1653–1662.
- Gubern, G., Imperial, S., Busquets, M., and Cortés, A. (1990). Partial characterization of the alanine aminotransferase isoenzymes from human liver. *Biochem. Soc. Trans.* *18*, 1288–1289.
- Hamers, A.A.J., Vos, M., Rassam, F., Marinković, G., Kurakula, K., van Gorp, P.J., de Winther, M.P.J., Gijbels, M.J.J., de Waard, V., and de Vries, C.J.M. (2012). Bone marrow-specific deficiency of nuclear receptor Nur77 enhances atherosclerosis. *Circ. Res.* *110*, 428–438.
- Hanna, R.N., Shaked, I., Hubbeling, H.G., Punt, J.A., Wu, R., Herrley, E., Zaugg, C., Pei, H., Geissmann, F., Ley, K., and Hedrick, C.C. (2012). NR4A1 (Nur77) deletion polarizes macrophages toward an inflammatory phenotype and increases atherosclerosis. *Circ. Res.* *110*, 416–427.
- Hayes, M.P., Wang, J., and Norcross, M.A. (1995). Regulation of interleukin-12 expression in human monocytes: selective priming by interferon-gamma of lipopolysaccharide-inducible p35 and p40 genes. *Blood* *86*, 646–650.
- Hedrick, E., Lee, S.O., Kim, G., Abdelrahim, M., Jin, U.H., Safe, S., and Abudayyeh, A. (2015). Nuclear receptor 4A1 (NR4A1) as a drug target for renal cell adenocarcinoma. *PLoS One* *10*, e0128308.
- Heinz, S., Benner, C., Spann, N., Bertolino, E., Lin, Y.C., Laslo, P., Cheng, J.X., Murre, C., Singh, H., and Glass, C.K. (2010). Simple combinations of lineage-determining transcription factors prime cis-regulatory elements required for macrophage and B cell identities. *Mol. Cell* *38*, 576–589.
- Hilgendorf, I., Gerhardt, L.M.S., Tan, T.C., Winter, C., Holderried, T.A.W., Chousterman, B.G., Iwamoto, Y., Liao, R., Zirlik, A., Scherer-Crosbie, M., et al. (2014). Ly-6Chigh monocytes depend on Nr4a1 to balance both inflammatory and reparative phases in the infarcted myocardium. *Circ. Res.* *114*, 1611–1622.
- Hu, Y.W., Zhang, P., Yang, J.Y., Huang, J.L., Ma, X., Li, S.F., Zhao, J.Y., Hu, Y.R., Wang, Y.C., Gao, J.J., et al. (2014). Nur77 decreases atherosclerosis progression in apoE(-/-) mice fed a high-fat/high-cholesterol diet. *PLoS One* *9*, e87313.
- Jha, A.K., Huang, S.C.C., Sergushichev, A., Lampropoulou, V., Ivanova, Y., Loginicheva, E., Chmielewski, K., Stewart, K.M., Ashall, J., Everts, B., et al. (2015). Network integration of parallel metabolic and transcriptional data reveals metabolic modules that regulate macrophage polarization. *Immunity* *42*, 419–430.
- Kent, W.J., Sugnet, C.W., Furey, T.S., Roskin, K.M., Pringle, T.H., Zahler, A.M., and Haussler, D. (2002). The human genome browser at UCSC. *Genome Res.* *12*, 996–1006.
- Kumar, V., Muratani, M., Rayan, N.A., Kraus, P., Lufkin, T., Ng, H.H., and Prabhakar, S. (2013). Uniform, optimal signal processing of mapped deep-sequencing data. *Nat. Biotechnol.* *31*, 615–622.
- Kurakula, K., Koenis, D.S., van Tiel, C.M., and de Vries, C.J.M. (2014). NR4A nuclear receptors are orphans but not lonesome. *Biochim. Biophys. Acta* *1843*, 2543–2555.
- Lampropoulou, V., Sergushichev, A., Bambouskova, M., Nair, S., Vincent, E.E., Loginicheva, E., Cervantes-Barragan, L., Ma, X., Huang, S.C.C., Griss, T., et al. (2016). Itaconate links inhibition of succinate dehydrogenase with macrophage metabolic remodeling and regulation of inflammation. *Cell Metab.* *24*, 158–166.
- Lee, S.O., Jin, U.H., Kang, J.H., Kim, S.B., Guthrie, A.S., Sreevalsan, S., Lee, J.S., and Safe, S. (2014). The orphan nuclear receptor NR4A1 (Nur77) regulates oxidative and endoplasmic reticulum stress in pancreatic cancer cells. *Mol. Cancer Res.* *12*, 527–538.
- Li, H., and Durbin, R. (2009). Fast and accurate short read alignment with Burrows-Wheeler transform. *Bioinformatics* *25*, 1754–1760.
- Li, L., Liu, Y., Chen, H.Z., Li, F.W., Wu, J.F., Zhang, H.K., He, J.P., Xing, Y.Z., Chen, Y., Wang, W.J., et al. (2015a). Impeding the interaction between Nur77 and p38 reduces LPS-induced inflammation. *Nat. Chem. Biol.* *11*, 339–346.
- Li, X.-M., Lu, X.-X., Xu, Q., Wang, J.-R., Zhang, S., Guo, P.-D., Li, J.-M., and Wu, H. (2015b). Nur77 deficiency leads to systemic inflammation in elderly mice. *J. Inflamm. (Lond.)* *12*, 40.
- Littlewood-Evans, A., Sarret, S., Apfel, V., Loesle, P., Dawson, J., Zhang, J., Muller, A., Tigan, B., Kneuer, R., Patel, S., et al. (2016). GPR91 senses extracellular succinate released from inflammatory macrophages and exacerbates rheumatoid arthritis. *J. Exp. Med.* *213*, 1655–1662.
- Liu, P.-S., Wang, H., Li, X., Chao, T., Teav, T., Christen, S., Di Conza, G., Cheng, W.-C., Chou, C.-H., Vavakova, M., et al. (2017).  $\alpha$ -Ketoglutarate orchestrates macrophage activation through metabolic and epigenetic reprogramming. *Nat. Immunol.* *18*, 985–994.
- Love, M.I., Huber, W., and Anders, S. (2014). Moderated estimation of fold change and dispersion for RNA-seq data with DESeq2. *Genome Biol.* *15*, 550.
- McLean, C.Y., Bristor, D., Hiller, M., Clarke, S.L., Schaar, B.T., Lowe, C.B., Wenger, A.M., and Bejerano, G. (2010). GREAT improves functional interpretation of cis-regulatory regions. *Nat. Biotechnol.* *28*, 495–501.
- Meerbrey, K.L., Hu, G., Kessler, J.D., Roarty, K., Li, M.Z., Fang, J.E., Herschkowitz, J.I., Burrows, A.E., Ciccio, A., Sun, T., et al. (2011). The pINDUCER lentiviral toolkit for inducible RNA interference in vitro and in vivo. *Proc. Natl. Acad. Sci. USA* *108*, 3665–3670.
- Mills, E.L., Kelly, B., Logan, A., Costa, A.S.H., Varma, M., Bryant, C.E., Tourlomis, P., Däbritz, J.H.M., Gottlieb, E., Latorre, I., et al. (2016). Succinate dehydrogenase supports metabolic repurposing of mitochondria to drive inflammatory macrophages. *Cell* *167*, 457–470.e13.
- Moore, K.J., and Tabas, I. (2011). Macrophages in the pathogenesis of atherosclerosis. *Cell* *145*, 341–355.
- Munder, M., Mallo, M., Eichmann, K., and Modolell, M. (1998). Murine macrophages secrete interferon gamma upon combined stimulation with interleukin (IL)-12 and IL-18: a novel pathway of autocrine macrophage activation. *J. Exp. Med.* *187*, 2103–2108.
- Murphy, M.P. (2009). How mitochondria produce reactive oxygen species. *Biochem. J.* *417*, 1–13.
- Oldham, W.M., Clish, C.B., Yang, Y., and Loscalzo, J. (2015). Hypoxia-mediated increases in L-2-hydroxyglutarate coordinate the metabolic response to reductive stress. *Cell Metab.* *22*, 291–303.
- Pei, L., Castrillo, A., Chen, M., Hoffmann, A., and Tontonoz, P. (2005). Induction of NR4A orphan nuclear receptor expression in macrophages in response to inflammatory stimuli. *J. Biol. Chem.* *280*, 29256–29262.
- Ridker, P.M., Everett, B.M., Thuren, T., MacFadyen, J.G., Chang, W.H., Ballantyne, C., Fonseca, F., Nicolau, J., Koenig, W., Anker, S.D., et al.; CANTOS Trial Group (2017). Antiinflammatory therapy with canakinumab for atherosclerotic disease. *N. Engl. J. Med.* *377*, 1119–1131.
- Ryan, D.G., and O'Neill, L.A.J. (2017). Krebs cycle rewired for macrophage and dendritic cell effector functions. *FEBS Lett.* *591*, 2992–3006.

- Salabei, J.K., Gibb, A.A., and Hill, B.G. (2014). Comprehensive measurement of respiratory activity in permeabilized cells using extracellular flux analysis. *Nat. Protoc.* *9*, 421–438.
- Sekiya, T., Kashiwagi, I., Yoshida, R., Fukaya, T., Morita, R., Kimura, A., Ichinose, H., Metzger, D., Chambon, P., and Yoshimura, A. (2013). Nr4a receptors are essential for thymic regulatory T cell development and immune homeostasis. *Nat. Immunol.* *14*, 230–237.
- Serhan, C.N., and Savill, J. (2005). Resolution of inflammation: the beginning programs the end. *Nat. Immunol.* *6*, 1191–1197.
- Trapnell, C., Pachter, L., and Salzberg, S.L. (2009). TopHat: discovering splice junctions with RNA-seq. *Bioinformatics* *25*, 1105–1111.
- Tripathi, S., Pohl, M.O., Zhou, Y., Rodriguez-Frandsen, A., Wang, G., Stein, D.A., Moulton, H.M., DeJesus, P., Che, J., Mulder, L.C.F., et al. (2015). Meta- and orthogonal integration of influenza “OMICs” data defines a role for UBR4 in virus budding. *Cell Host Microbe* *18*, 723–735.
- Van den Bossche, J., Baardman, J., and de Winther, M.P.J. (2015). Metabolic characterization of polarized M1 and M2 bone marrow-derived macrophages using real-time extracellular flux analysis. *J. Vis. Exp.* Published online November 28. <https://doi.org/10.3791/53424>
- Van den Bossche, J., Baardman, J., Otto, N.A., van der Velden, S., Neele, A.E., van den Berg, S.M., Luque-Martin, R., Chen, H.J., Boshuizen, M.C.S., Ahmed, M., et al. (2016). Mitochondrial dysfunction prevents repolarization of inflammatory macrophages. *Cell Rep.* *17*, 684–696.
- van Diepen, J.A., Robben, J.H., Hooiveld, G.J., Carmone, C., Alsady, M., Boutens, L., Bekkenkamp-Grovenstein, M., Hijmans, A., Engelke, U.F.H., Wevers, R.A., et al. (2017). SUCNR1-mediated chemotaxis of macrophages aggravates obesity-induced inflammation and diabetes. *Diabetologia* *60*, 1304–1313.
- Wang, S., Sun, H., Ma, J., Zang, C., Wang, C., Wang, J., Tang, Q., Meyer, C.A., Zhang, Y., and Liu, X.S. (2013). Target analysis by integration of transcriptome and ChIP-seq data with BETA. *Nat. Protoc.* *8*, 2502–2515.
- Ye, T., Krebs, A.R., Choukrallah, M.-A., Keime, C., Plewniak, F., Davidson, I., and Tora, L. (2011). seqMINER: an integrated ChIP-seq data interpretation platform. *Nucleic Acids Res.* *39*, e35.
- Zhang, Y., Liu, T., Meyer, C.A., Eeckhoute, J., Johnson, D.S., Bernstein, B.E., Nusbaum, C., Myers, R.M., Brown, M., Li, W., and Liu, X.S. (2008). Model-based analysis of ChIP-Seq (MACS). *Genome Biol.* *9*, R137.

## STAR★METHODS

### KEY RESOURCES TABLE

| REAGENT or RESOURCE                                                                               | SOURCE                    | IDENTIFIER                        |
|---------------------------------------------------------------------------------------------------|---------------------------|-----------------------------------|
| <b>Antibodies</b>                                                                                 |                           |                                   |
| Mouse anti-HA tag                                                                                 | Diagenode                 | Cat# C15200190; RRID: AB_2737029  |
| Rabbit anti-Nur77                                                                                 | Santa Cruz                | Cat# sc-5569; RRID: AB_653373     |
| Mouse anti- $\alpha$ -Tubulin                                                                     | Cedarlane                 | Cat# CLT9002; RRID: AB_10060319   |
| Rabbit anti- $\beta$ -Actin                                                                       | Cell Signaling Technology | Cat# 4967L; RRID: AB_330288       |
| Rabbit anti-mouse IL-1 $\beta$                                                                    | Cell Signaling Technology | Cat# 12507S; RRID: AB_2721117     |
| Rabbit anti-HIF-1 $\alpha$                                                                        | Novus Biologicals         | Cat# NB100-449; RRID: AB_10001045 |
| Rabbit anti-iNOS                                                                                  | Abcam                     | Cat# ab3523; RRID: AB_303872      |
| Mouse anti-SDHA                                                                                   | Abcam                     | Cat# ab14715; RRID: AB_301433     |
| Rat anti-mouse MAC-3                                                                              | PharMingen                | Cat# 553322; RRID: AB_394780      |
| Rabbit anti-CD3                                                                                   | Labvision                 | Cat# RM-9107; RRID: AB_149921     |
| Mouse anti-Smooth Muscle Actin (SMA)                                                              | DAKO                      | Cat# M0851; RRID: AB_2223500      |
| <b>Bacterial and Virus Strains</b>                                                                |                           |                                   |
| Lentiviral pINDUCER20b-HA-NUR77 and pINDUCER20b-GFP                                               | This paper                | N/A                               |
| Lentiviral short hairpin (sh)RNA targeting mouse Nur77 (shNur77) or control (shCtrl)              | (Bonta et al., 2006)      | N/A                               |
| Lentiviral expression vector for CMV promoter-drive expression of human NUR77 or backbone control | (Bonta et al., 2006)      | N/A                               |
| <b>Chemicals, Peptides, and Recombinant Proteins</b>                                              |                           |                                   |
| Dynabeads® Protein G for Immunoprecipitation                                                      | Novex                     | Cat# 10003D                       |
| Di(N-succinimidyl) glutarate                                                                      | Sigma-Aldrich             | Cat# 80424; CAS: 79642-50-5       |
| Lipopolysaccharides (LPS) from <i>Escherichia coli</i> O55:B5                                     | Sigma-Aldrich             | Cat# 62326                        |
| Doxycycline hyclate                                                                               | Sigma-Aldrich             | Cat# D9891; CAS: 24390-14-5       |
| Oligomycin A                                                                                      | Sigma-Aldrich             | Cat# 75351; CAS: 579-13-5         |
| Carbonyl cyanide 4-(trifluoromethoxy)phenylhydrazone (FCCP)                                       | Sigma-Aldrich             | Cat# C2920; CAS: 370-86-5         |
| Rotenone                                                                                          | Sigma-Aldrich             | Cat# R8875; CAS: 83-79-4          |
| Antimycin A                                                                                       | Sigma-Aldrich             | Cat# A8674; CAS: 1397-94-0        |
| Digitonin                                                                                         | Sigma-Aldrich             | Cat# D141; CAS: 11024-24-1        |
| MitoTracker Green FM                                                                              | Molecular Probes          | Cat# M7514; CAS: 201860-17-5      |
| MitoTracker Red CM-H <sub>2</sub> Xros                                                            | Molecular Probes          | Cat# M7513; CAS: 167095-08-1      |
| LysoTracker Red DND-99                                                                            | Molecular Probes          | Cat# L7528; CAS: 231946-72-8      |
| MitoSOX Red Mitochondrial Superoxide Indicator                                                    | Molecular Probes          | Cat# M36008                       |
| 2',7'-Dichlorofluorescein diacetate (DCFDA)                                                       | Sigma-Aldrich             | Cat# D6883; CAS: 4091-99-0        |
| Dimethyl malonate                                                                                 | Sigma-Aldrich             | Cat# 136441; CAS: 108-59-8        |
| 3-Nitropropionic acid                                                                             | Sigma-Aldrich             | Cat# N5636; CAS: 504-88-1         |
| Hoechst 33258, Pentahydrate (bis-Benzimide)                                                       | Invitrogen                | Cat# H3569; CAS: 23491-45-4       |
| <b>Critical Commercial Assays</b>                                                                 |                           |                                   |
| TruSeq Stranded mRNA Library Prep Kit                                                             | Illumina                  | Cat# 15031047                     |
| Succinate Assay Kit (Colorimetric)                                                                | Abcam                     | Cat# ab204718                     |
| Cytometric Bead Array (CBA) Mouse Inflammation Kit                                                | BD Biosciences            | Cat# 552364                       |
| iScript cDNA synthesis kit                                                                        | BioRad                    | Cat# 1708891                      |
| CellTiter-Glo® Luminescent Cell Viability Assay                                                   | Promega                   | Cat# G7570                        |

(Continued on next page)



| <b>Continued</b>                                                             |                                              |                                                                                                                                                                                                                                                                                                                       |
|------------------------------------------------------------------------------|----------------------------------------------|-----------------------------------------------------------------------------------------------------------------------------------------------------------------------------------------------------------------------------------------------------------------------------------------------------------------------|
| REAGENT or RESOURCE                                                          | SOURCE                                       | IDENTIFIER                                                                                                                                                                                                                                                                                                            |
| Bright-DAB                                                                   | ImmunoLogic                                  | Cat# BS04-500                                                                                                                                                                                                                                                                                                         |
| <i>In Situ</i> Cell Death Detection Kit, Fluorescein                         | Roche                                        | Cat# 11684795910                                                                                                                                                                                                                                                                                                      |
| Deposited Data                                                               |                                              |                                                                                                                                                                                                                                                                                                                       |
| Raw and analyzed Nur77 ChIP-seq and RNA-seq data                             | This paper                                   | GEO: GSE102394                                                                                                                                                                                                                                                                                                        |
| Experimental Models: Cell Lines                                              |                                              |                                                                                                                                                                                                                                                                                                                       |
| Mouse: RAW264.7                                                              | ATCC                                         | TIB-71                                                                                                                                                                                                                                                                                                                |
| Experimental Models: Organisms/Strains                                       |                                              |                                                                                                                                                                                                                                                                                                                       |
| Mouse: Nur77-deficient: Tg(CMV-cre)1Cgn/ <i>Nr4a1</i> <sup>tm1Pcn</sup>      | This paper                                   | N/A                                                                                                                                                                                                                                                                                                                   |
| Mouse: Nur77 <sup>fl/fl</sup> : <i>Nr4a1</i> <sup>tm1Pcn</sup>               | (Sekiya et al., 2013)                        | MGI: 5546594                                                                                                                                                                                                                                                                                                          |
| Mouse: CMV:cre: B6.C-Tg(CMV-cre)1Cgn/J                                       | Charles River                                | JAX: 006054                                                                                                                                                                                                                                                                                                           |
| Mouse: <i>Ldlr</i> <sup>-/-</sup> : B6.129S7-Ldlrtm1Her/J                    | The Jackson Laboratory                       | JAX: 002207                                                                                                                                                                                                                                                                                                           |
| Oligonucleotides                                                             |                                              |                                                                                                                                                                                                                                                                                                                       |
| Primers for mtDNA/nDNA quantification, ChIP-qPCR, and RT-qPCR: see Table S3. | This paper                                   | N/A                                                                                                                                                                                                                                                                                                                   |
| Recombinant DNA                                                              |                                              |                                                                                                                                                                                                                                                                                                                       |
| pINDUCER20b-HA-NUR77 and pINDUCER20b-GFP                                     | This paper; based on (Meerbrey et al., 2011) | N/A                                                                                                                                                                                                                                                                                                                   |
| p156RRL-sinPPT-CMV-GFP-PRE-shNur77 and p156RRL-sinPPT-CMV-GFP-PRE-shCtrl     | (Bonta et al., 2006)                         | N/A                                                                                                                                                                                                                                                                                                                   |
| Software and Algorithms                                                      |                                              |                                                                                                                                                                                                                                                                                                                       |
| GraphPad Prism                                                               | GraphPad Software                            | <a href="https://www.graphpad.com/scientific-software/prism/">https://www.graphpad.com/scientific-software/prism/</a> ; RRID: SCR_002798                                                                                                                                                                              |
| Burrow-Wheeler Aligner 0.7.10                                                | (Li and Durbin, 2009)                        | <a href="http://bio-bwa.sourceforge.net/">http://bio-bwa.sourceforge.net/</a>                                                                                                                                                                                                                                         |
| TopHat 2.1                                                                   | (Trapnell et al., 2009)                      | <a href="http://ccb.jhu.edu/software/tophat/index.shtml">http://ccb.jhu.edu/software/tophat/index.shtml</a>                                                                                                                                                                                                           |
| HTSeq 0.6.1                                                                  | (Anders et al., 2015)                        | <a href="https://pypi.python.org/pypi/HTSeq">https://pypi.python.org/pypi/HTSeq</a>                                                                                                                                                                                                                                   |
| DESeq2 3.5                                                                   | (Love et al., 2014)                          | <a href="http://bioconductor.org/packages/release/bioc/html/DESeq2.html">http://bioconductor.org/packages/release/bioc/html/DESeq2.html</a>                                                                                                                                                                           |
| MACS 1.4                                                                     | (Zhang et al., 2008)                         | <a href="http://liulab.dfci.harvard.edu/MACS/">http://liulab.dfci.harvard.edu/MACS/</a>                                                                                                                                                                                                                               |
| DFilter 1.5                                                                  | (Kumar et al., 2013)                         | <a href="http://collaborations.gis.a-star.edu.sg/~cmb6/kumarv1/dfilter/">http://collaborations.gis.a-star.edu.sg/~cmb6/kumarv1/dfilter/</a>                                                                                                                                                                           |
| UCSC Genome Browser                                                          | (Kent et al., 2002)                          | <a href="http://genome.ucsc.edu/">http://genome.ucsc.edu/</a>                                                                                                                                                                                                                                                         |
| seqMINER 1.3.3e                                                              | (Ye et al., 2011)                            | <a href="http://bips.u-strasbg.fr/">http://bips.u-strasbg.fr/</a>                                                                                                                                                                                                                                                     |
| HOMER 4.9                                                                    | (Heinz et al., 2010)                         | <a href="http://homer.ucsd.edu/homer/">http://homer.ucsd.edu/homer/</a>                                                                                                                                                                                                                                               |
| BETA 1.0.0                                                                   | (Wang et al., 2013)                          | <a href="http://cistrome.org/BETA/">http://cistrome.org/BETA/</a>                                                                                                                                                                                                                                                     |
| GREAT 3.0.0                                                                  | (McLean et al., 2010)                        | <a href="http://bejerano.stanford.edu/great/public/html/index.php">http://bejerano.stanford.edu/great/public/html/index.php</a>                                                                                                                                                                                       |
| Metascape 3.0                                                                | (Tripathi et al., 2015)                      | <a href="http://metascape.org">http://metascape.org</a>                                                                                                                                                                                                                                                               |
| ImageJ 1.50                                                                  | NIH                                          | <a href="https://imagej.nih.gov/ij/index.html">https://imagej.nih.gov/ij/index.html</a> ; RRID: SCR_003070                                                                                                                                                                                                            |
| Leica QWin V3                                                                | Leica                                        | N/A                                                                                                                                                                                                                                                                                                                   |
| LinRegPCR 2015.3                                                             |                                              | <a href="http://www.hartfaalcentrum.nl/index.php?main=files&amp;fileName=LinRegPCR.zip&amp;description=LinRegPCR:%20qPCR%20data%20analysis&amp;sub=LinRegPCR">http://www.hartfaalcentrum.nl/index.php?main=files&amp;fileName=LinRegPCR.zip&amp;description=LinRegPCR:%20qPCR%20data%20analysis&amp;sub=LinRegPCR</a> |
| CytExpert 2.0                                                                | Beckman Coulter                              | <a href="https://www.beckman.com/coulter-flow-cytometry/software/cytextpert-software">https://www.beckman.com/coulter-flow-cytometry/software/cytextpert-software</a>                                                                                                                                                 |

## CONTACT FOR REAGENT AND RESOURCE SHARING

Further information and requests for resources and reagents should be directed to and will be fulfilled by the *Lead Contact*, Carlie J.M. de Vries (c.j.devries@amc.nl).

## EXPERIMENTAL MODEL AND SUBJECT DETAILS

### Mouse strains

All animal housing, care, and procedures were approved by the institutional Animal Experimental Committee for Animal Welfare in accordance with Directive 2010/63/EU of the European Parliament. Whole-body Nur77 knockout mice were generated by crossing mice overexpressing Cre recombinase under control of the human cytomegalovirus (CMV) promoter with mice containing a *loxP*-flanked Nur77 (*Nr4a1*) locus (Sekiya et al., 2013). Nur77 deletion was confirmed by genotyping PCR and mice were subsequently crossed to generate Nur77-deficient mice that no longer express Cre recombinase (Nur77-KO). These Nur77-KO mice and their wild-type (WT) littermates were used for experiments.

### Bone marrow transplantation and atherosclerosis progression

Bone marrow cells were isolated from femurs and tibiae of male 10-week-old WT or Nur77-KO mice and  $1 \times 10^7$  cells/mouse were injected intravenously into female 10-week-old  $\gamma$ -irradiated *Ldlr*<sup>-/-</sup> recipient mice. After a 6-week recovery period, mice were fed a Western-type diet (Harlan) containing 42% calories from fat for 14 weeks. Mice were euthanized via ketamine/xylazine overdose (238 mg/kg ketamine, 102 mg/kg xylazine i.p. injection) and orbital bleeding. Hearts were excised, cut below the atrial tips, fixed with 4% formalin, embedded in paraffin, and sectioned to 7  $\mu$ m. Aortic root lesion size and necrotic areas were assessed using hematoxylin and eosin-stained sections. Immunohistochemistry was performed using antibodies directed against HIF-1 $\alpha$ , or macrophage (MAC-3), smooth muscle cell (smooth muscle actin; SMA), or T cell (CD3) specific markers and appropriate horseradish peroxidase (HRP)-conjugated secondary antibodies, followed by detection with Bright-DAB. Apoptotic cells were assessed by TUNEL assay using the *In Situ* Cell Death Detection Kit, Fluorescein according to manufacturer's instructions. Quantification was performed using ImageJ and Leica QWin V3 software.

### Bone marrow-derived macrophage (BMDM) differentiation and cell culture

Bone marrow cells were isolated from femurs and tibiae of male or female 6-8 weeks old WT and Nur77-KO mice and differentiated to macrophages by culturing in RPMI medium supplemented with 10% fetal calf serum, 100 U/mL penicillin, 100  $\mu$ g/mL streptomycin, 2 mM L-glutamine, and 15% L929-conditioned medium for 7 days. After differentiation, cells were lifted, counted, and re-seeded for *in vitro* experiments at  $0.6 \times 10^6$  BMDMs per mL. In all experiments involving LPS-stimulated BMDMs, a concentration of 100 ng/mL lipopolysaccharide (LPS) was used. In experiments involving concomitant SDH inhibition, BMDMs were pre-treated with 500  $\mu$ M 3-nitropropionic acid (NPA) for 30 min prior to LPS stimulation.

### RAW264.7 macrophage cell culture

The mouse macrophage RAW264.7 cell line was cultured in DMEM medium supplemented with 10% fetal calf serum, 100 U/mL penicillin, 100  $\mu$ g/mL streptomycin, and 2 mM L-glutamine. Low passage (< 15 passages) cells were used for all experiments. For experiments involving RAW264.7 stable cell lines with doxycycline (Dox)-inducible overexpression, cells were treated with 1  $\mu$ g/mL Dox for 18 hr.

## METHOD DETAILS

### Lentiviral transductions

#### Vector construction, transduction, and stable cell line generation for doxycycline-inducible HA-NUR77 expression in RAW264.7 macrophages

The lentiviral vectors pINDUCER20b-GFP and pINDUCER20b-HA-NUR77 encoding Dox-induced overexpression of either eGFP or HA-tagged NUR77 were constructed by cloning the coding-domain sequences of either eGFP or human Nur77 into the pENTR4-HA vector using the restriction enzymes KpnI and BamHI and subsequently recombining these plasmids into the pINDUCER20b destination vector by Gateway LR reaction. pINDUCER20b is a modified version of pINDUCER20 that contains a Blasticidin resistance cassette instead of Neomycin resistance. Lentiviral particles were produced in HEK293T cells by co-transfecting third generation lentiviral packaging vectors and lentiviral vector containing the gene-of-interest. Supernatants were collected over the course of 72 hr and filtered through a 0.45  $\mu$ m filter. Lentiviral particles were concentrated by ultracentrifugation for 2 hr at 110,000  $\times$  g. Low-passage RAW264.7 cells were transduced for 24 hr at a multiplicity of infection (MOI) of 100 in the presence of 2  $\mu$ g/mL polybrene. Transduced cells were selected for with 10 mg/mL Blasticidin (Sigma) starting 48 hr after transduction. After 5-7 days, resistant polyclonal colonies were further expanded and Dox-inducible expression of GFP or HA-NUR77 was assessed by RT-qPCR, western blotting, and immunofluorescence microscopy.

### **Lentiviral short hairpin RNA-mediated Nur77 knockdown in RAW264.7 macrophages and NUR77 overexpression in BMDMs**

Lentiviral particles containing expression vectors for short hairpin (sh)RNA targeting mouse Nur77 (shNur77), scrambled shRNA control (shCtrl), human NUR77 overexpression, or backbone control (Mock) were previously described (Bonta et al., 2006) and produced in HEK293T cells as detailed above. BMDMs or RAW264.7 macrophages were transduced for 24 hr with lentiviral particles at a MOI of 10 in the presence of 2  $\mu\text{g}/\text{mL}$  polybrene. Cells were subsequently cultured for an additional 48 hr after which GFP expression was verified by fluorescence microscopy as a measure of transduction efficiency. Cells were re-seeded for experiments and knockdown of endogenous Nur77 (*Nr4a1*) or overexpression of human NUR77 (*NR4A1*) was confirmed using RT-qPCR.

### **RNA sequencing (RNA-seq)**

RAW264.7 stable cell lines with Dox-inducible overexpression of GFP or HA-NUR77 were seeded in triplicate in 10-cm culture dishes at  $1 \times 10^6$  cells per plate. The next day, cells were stimulated with 1  $\mu\text{g}/\text{mL}$  Dox for 18 hr, after which RNA was extracted using TRIreagent (Sigma) according to the manufacturer's instructions. The RNA pellet was dried and dissolved in an appropriate volume of nuclease-free ultrapure water and quantified using Nanodrop UV-VIS Spectrophotometer (Thermo Fisher). RNA was further purified using the MinElute Cleanup Kit (QIAGEN) according to the manufacturer's instructions. Quality and quantity of the isolated RNA was assessed using a 2100 Bioanalyzer with a Nano chip (Agilent). Strand-specific libraries were generated using the TruSeq Stranded mRNA Library Prep Kit (Illumina). Polyadenylated RNA from 1000 ng intact total RNA was purified using oligo-dT beads. Following purification, the RNA was fragmented, random primed, and reverse transcribed using SuperScript II Reverse Transcriptase (Invitrogen). Second strand synthesis was performed using Polymerase I and RNase H with replacement of dTTP for dUTP. The generated cDNA fragments were 3' end adenylated and ligated to Illumina Paired-end sequencing adapters and subsequently amplified by 12 cycles of PCR. The libraries were analyzed on a 2100 Bioanalyzer using a 7500 chip (Agilent), diluted, and pooled in equimolar ratio into a 13-plex, 10 nM sequencing pool. Libraries were sequenced on an Illumina HiSeq 2500 using V4 chemistry in single-end 65 bp reads.

### **Chromatin immunoprecipitation sequencing (ChIP-seq)**

RAW264.7 stable cell line with Dox-inducible overexpression of HA-NUR77 was seeded in eighteen 15-cm culture dishes at  $6 \times 10^6$  cells per plate. The next day, cells were stimulated with 1  $\mu\text{g}/\text{mL}$  Dox for 18 hr, after which cells were washed with PBS and dual crosslinked directly in culture plates with 2 mM Di(N-succinimidyl) glutarate (Sigma) in PBS for 45 min at room temperature, followed by 1% formaldehyde (Sigma) for 15 min at room temperature. Crosslinking reactions were quenched by addition of glycine to 0.125 M final concentration and incubation for 5 min at room temperature. Crosslinked cells were washed with ice-cold PBS and collected by scraping in ice-cold PBS followed by centrifugation for 5 min at 500  $\times g$ . Cell pellets were resuspended in buffer L1A (10 mM HEPES-KOH pH 7.9, 85 mM KCl, 1 mM EDTA). Cell membranes were lysed by diluting samples 1:1 with buffer L1B (L1A plus 1% IGEPAL CA-630) and incubating 10 min on ice. Cells were subsequently centrifuged 5 min at 700  $\times g$  and pellets were re-suspended in buffer L2 (50 mM Tris-HCl pH 7.4, 1% SDS, 10 mM EDTA). Nuclei were ruptured and chromatin was sonicated into approximately 200 bp fragments using a Bioruptor Pico (Diagenode) for 20 cycles of 30 s on and 30 s off. Fragment length was confirmed by running an aliquot of reverse crosslinked chromatin on a 1.2% agarose gel. Sonicated chromatin samples were centrifuged for 10 min at 16,000  $\times g$  to pellet cell debris. Supernatants were transferred to DNA LoBind tubes (Sigma) and diluted 1:1.5 with dilution buffer (20 mM Tris-HCl pH 7.4, 100 mM NaCl, 2 mM EDTA, 0.5% Triton X-100). Per ChIP reaction, 30  $\mu\text{L}$  Protein G Dynabeads (Novex) were washed twice with 0.5% bovine serum albumin (BSA) in PBS and incubated with 2  $\mu\text{g}$  anti-HA antibody (Diagenode) for 3 hr at 4°C. Dynabead-antibody complexes were added to each diluted chromatin sample (18 ChIPs total) and incubated overnight at 4°C to immunoprecipitate chromatin-linked HA-NUR77 protein. Immunoprecipitates were washed four times with wash buffer 1 (20 mM Tris-HCl pH 7.4, 150 mM NaCl, 0.1% SDS, 1% Triton X-100, 2 mM EDTA), four times with wash buffer 2 (10 mM Tris-HCl pH 7.4, 250 mM LiCl, 1% IGEPAL CA-630, 0.7% sodium deoxycholate, 1 mM EDTA), twice with wash buffer 3 (10 mM Tris-HCl pH 7.4, 0.2% Triton X-100, 1 mM EDTA), and twice with wash buffer 4 (10 mM Tris-HCl pH 7.4, 50 mM NaCl, 1 mM EDTA). Samples were transferred to fresh DNA LoBind tubes after the first and second to last wash steps to reduce background. Chromatin was eluted from Dynabeads by incubating in elution buffer (10 mM Tris-HCl pH 7.4, 2% SDS, 1 mM EDTA) for 20 min at 37°C. Crosslinks were reversed by addition of NaCl to a final concentration of 300 mM and incubating overnight at 65°C. DNA was purified by incubating samples with 0.33 mg/mL RNase A for 1 hr at 37°C, followed by 0.5 mg/mL Proteinase K for 1 hr at 50°C, and extraction of DNA by phenol:chloroform:isoamylalcohol precipitation. Precipitated DNA was dissolved in ultrapure water and DNA from 6 separate ChIP reactions was pooled to create one biological replicate, resulting in three biological replicates total. ChIP DNA samples were then sequenced on an Illumina HiSeq 2500 in single-end 50 bp reads.

### **Quantitative PCR (qPCR)**

#### **Reverse transcription (RT)-qPCR**

Total RNA from cultured cells was isolated using TRIreagent (Sigma). Reverse transcription (RT)-PCR was performed on 1  $\mu\text{g}$  RNA using iScript cDNA Synthesis Kit (BioRad). qPCR was carried out using SensiFAST SYBR No-ROX Kit (BioLine) on a LightCycler 480 II PCR platform (Roche). Quantification cycles ( $C_q$ ), primer set amplification efficiencies, and transcript starting concentrations (NO)

were calculated using LinRegPCR. Target gene expression was normalized by dividing by the geometric mean of *Actb* and *Rplp0* housekeeping gene expression. Sequences of the primers used for RT-qPCR can be found in [Table S3](#).

#### ChIP-qPCR

The RAW264.7 stable cell line with Dox-inducible overexpression of HA-NUR77 was seeded in quadruplicate in 15-cm culture dishes at  $6 \times 10^6$  cells per plate. The next day, cells were stimulated with 1  $\mu\text{g}/\text{mL}$  Dox for 18 hr and chromatin was crosslinked, extracted, and immunoprecipitated using anti-HA antibody as described above. ChIP and 1% input DNA samples were quantified by qPCR as described above. Percentage of input was calculated using the following formula: primer efficiency<sup>C<sub>q</sub>(input-6.644) - C<sub>q</sub>(ChIP)</sup>. ChIP-qPCR results are shown as fold change in percentage of input for target regions over the mean of two non-target regions. Sequences of the primers used for ChIP-qPCR can be found in [Table S3](#).

#### SDS-PAGE and western blotting

Cultured cells were washed with PBS and lysed in RIPA Lysis and Extraction Buffer (Thermo Fisher) or nuclear and cytosolic fractions were made using the NE-PER Nuclear and Cytoplasmic Extraction Reagents (Thermo Fisher). Protein samples were heated for 5 min at 96°C and resolved on 10% SDS-PAGE gels and transferred onto nitrocellulose membranes using the semi-dry Trans-Blot Turbo Transfer System (BioRad). Membranes were blocked for 1 hr at room temperature with Tris-buffered saline containing 0.05% Tween-20 and 5% (w/v) dried milk. Membranes were incubated overnight at 4°C with primary antibody, followed by the appropriate HRP-conjugated secondary antibody for 1 hr at room temperature. After washing, blots were developed using SuperSignal West Pico Chemiluminescent Substrate (Thermo Fisher) and visualized on the ImageQuant LAS 4000 (GE Healthcare).

#### Immunofluorescence microscopy

RAW264.7 stable cell lines were cultured on uncoated glass coverslips, stimulated with 1  $\mu\text{g}/\text{mL}$  Dox for 24 hr, and fixed with 4% (w/v) paraformaldehyde in PBS. Cells were subsequently permeabilized with 0.5% (v/v) Triton X-100 and HA-NUR77 expression was detected using rabbit anti-Nur77 (Santa Cruz) and Alexa Fluor 488-conjugated goat anti-rabbit (Molecular Probes) antibodies. Nuclei were visualized using Hoechst 33258 (Invitrogen).

#### Oxygen consumption and lactate production (Seahorse) assays

Oxygen consumption and lactate production were simultaneously measured in a Seahorse XF96 Analyzer (Agilent) using an established protocol ([Van den Bossche et al., 2015](#)). BMDMs were seeded at  $0.5 \times 10^5$  cells/well in XF96-well plates (Agilent) and left unstimulated or stimulated with 100 ng/mL LPS for 24 h. Wells without cells were included as a background control. Sensor plates were calibrated overnight in a CO<sub>2</sub>-free incubator at 37°C using 200  $\mu\text{L}/\text{well}$  XF calibrant solution (Agilent). After LPS stimulation, culture medium was replaced with glucose-free DMEM medium supplemented with 2 mM L-glutamine and cells were incubated 1 hr in a CO<sub>2</sub>-free incubator at 37°C. Injection ports were loaded with 10x injection mixes to obtain a final concentration in each well of 25 mM glucose after the first injection, 1.5  $\mu\text{M}$  oligomycin after the second injection, 1 mM sodium pyruvate plus 1.5  $\mu\text{M}$  FCCP after the third injection, and 1.25  $\mu\text{M}$  rotenone plus 2.5  $\mu\text{M}$  antimycin A after the fourth injection. After the run, supernatants were carefully aspirated and protein was isolated using RIPA Lysis and Extraction Buffer (Thermo Fisher). OCR and ECAR values were normalized to total protein content of each well as determined by DC Protein Assay (BioRad). Parameters of OXPHOS and glycolysis were calculated from OCR and ECAR values as shown in [Figures S2C](#) and [S2E](#).

#### Determination of ATP levels

BMDMs were seeded at  $0.6 \times 10^6$  cells/mL in 96-well plates and left unstimulated or stimulated with 100 ng/mL LPS for times indicated. After LPS stimulation, cells were treated with 5  $\mu\text{M}$  oligomycin and total ATP levels were immediately measured using the CellTiter-Glo Luminescent Cell Viability Assay (Promega). Luminescence values were recorded using a GloMax Multi Microplate Multimode Reader (Promega).

#### Determination of mitochondrial and lysosomal abundance and co-localization

##### Mitochondrial DNA

BMDMs were seeded at  $0.6 \times 10^6$  cells/mL in 12-well plates. The next day, total DNA was extracted from BMDMs using a DNeasy Blood & Tissue Kit (QIAGEN) and 25 ng of DNA was used for qPCR as described above using primers for mitochondrial DNA or nuclear DNA as an internal control. Primer sequences are shown in [Table S3](#).

##### Flow cytometry

BMDMs were seeded at  $0.6 \times 10^6$  cells/mL in non-tissue culture treated 48-well plates. The next day, culture medium was removed and cells were stained with 100 nM MitoTracker Green FM in HBSS/+Ca/+Mg for 30 min at 37°C and 5% CO<sub>2</sub> in the dark or left unstained as a control. Cells were subsequently washed with PBS, lifted using ice-cold PBS containing 5 mM EDTA, and transferred to 96-well FACS plates. Fluorescence was measured using a Beckman Coulter CytoFLEX flow cytometer and data were analyzed using CytExpert software.

##### Wide-field microscopy

BMDMs were seeded at  $0.5 \times 10^5$  cells/well in uncoated Nunc Lab-Tek chambered 1.0 borosilicated coverglass plates (Thermo Scientific). The next day, cells were stained with 100 nM MitoTracker Green FM, 75 nM LysoTracker Red DND-99, and/or 2  $\mu\text{g}/\text{mL}$



Hoechst 33258 in HBSS/+Ca/+Mg for 30 min at 37°C to visualize mitochondria, lysosomes, and nuclei, respectively. Cells were subsequently washed with complete medium and directly imaged using a widefield microscope (NIKON Eclipse TI) equipped with a 60x 1.49 NA Apo TIRF (oil) objective and an Andor Zyla 4.2 plus sCMOS camera. An Okolab cage incubator and humidified CO<sub>2</sub> gas chamber set to 37°C and 5% CO<sub>2</sub> were used during the imaging process. For quantification of mitochondrial and lysosomal abundance, the mean fluorescence intensity (MFI) of MitoTracker Green FM or LysoTracker Red DND-99 fluorophores was determined in regions of interest demarcating individual cells in the original recorded data using ImageJ. Calculation of the Pearson correlation coefficient (Pearson's *r*) for co-localization of MitoTracker Green FM and LysoTracker Red DND-99 signal was performed using ImageJ with the "Colocalization threshold" plugin. For display purposes, all images were similarly enhanced using the unsharp mask filter and window/level settings in ImageJ.

### Determination of intracellular metabolite abundance by LC-MS (metabolomics)

BMDMs were seeded at  $0.6 \times 10^6$  cells/mL in 6-well plates and left unstimulated or stimulated with 100 ng/mL LPS for 24 h. Cells were washed three times with ice-cold 0.9% NaCl and metabolism was quenched by adding 250  $\mu$ L ice-cold methanol followed by 250  $\mu$ L ice-cold ultrapure water. Cells were collected by scraping and each well was rinsed with an additional 250  $\mu$ L ice-cold methanol followed by 250  $\mu$ L ice-cold ultrapure water. The entire homogenate (1 mL total volume) was pooled and transferred to a 2 mL tube and 5  $\mu$ M of internal standards were added to each sample: D<sub>3</sub>-aspartic acid, D<sub>3</sub>-serine, D<sub>5</sub>-glutamine, D<sub>3</sub>-glutamate, <sup>13</sup>C<sub>3</sub>-pyruvate, <sup>13</sup>C<sub>6</sub>-isoleucine, <sup>13</sup>C<sub>6</sub>-glucose, <sup>13</sup>C<sub>6</sub>-fructose-1,6-biphosphate, <sup>13</sup>C<sub>6</sub>-glucose-6-phosphate, adenosine-<sup>15</sup>N<sub>5</sub>-monophosphate and guanosine-<sup>15</sup>N<sub>5</sub>-monophosphate. 1 mL of chloroform was added to each sample, followed by thorough mixing and centrifugation for 10 min at 14,000 rpm at 4°C. The "polar" top layer was transferred to a new 1.5 mL tube and dried in a vacuum concentrator. Dried samples were dissolved in 100  $\mu$ L methanol/water (6/4; v/v). Metabolite abundance was measured using an ultra-high-pressure liquid chromatography system (Thermo Scientific) coupled to a Thermo Q Exactive (Plus) Orbitrap mass spectrometer (Thermo Scientific). The autosampler was held at 10°C during the runs and 5  $\mu$ L of sample was injected on the analytical column. The chromatographic separation was established using a SeQuant ZIC-cHILIC column (PEEK 100  $\times$  2.1 mm, 3.0  $\mu$ m particle size; Merck) and kept at 15°C. The flow rate was set to 0.250 mL/min. The mobile phase was composed of (A) 9/1 acetonitrile/water with 5 mM ammonium acetate; pH 6.8 and (B) 1/9 acetonitrile/water with 5 mM ammonium acetate; pH 6.8, respectively. The LC gradient program was as follows: beginning with 100% (A) hold 0-3 min; ramping 3-20 min to 36% (A); ramping from 20-24 min to 20% (A); hold from 24-27 min at 20% (A); ramping from 27-28 min to 100% (A); and re-equilibrate from 28-35 min with 100% (A). The MS data were acquired in negative mode at full scan range at 140,000 resolution. Data were analyzed using Xcalibur software (Thermo Scientific) and normalized to total protein content in each well as determined by DC Protein Assay (BioRad).

### SDH activity assays

#### SDH-mediated respiration

SDH-mediated respiration was measured in plasma membrane-permeabilized BMDMs using an established protocol (Salabei et al., 2014). BMDMs were seeded at  $0.5 \times 10^5$  cells/well in XF96-well plates (Agilent) and left unstimulated or stimulated with 100 ng/mL LPS for 24 h. Oxygen consumption was measured using a Seahorse XF96 Analyzer (Agilent) as described above with the following modifications: after LPS stimulation, culture medium was replaced with MAS buffer (220 mM mannitol, 70 mM sucrose, 10 mM KH<sub>2</sub>PO<sub>4</sub>, 5 mM MgCl<sub>2</sub>, 2 mM HEPES, 1 mM EGTA, pH 7.4) and injection ports were loaded with 10x injection mixes to obtain a final concentration in each well of 10 mM succinate, 1 mM ADP, 30  $\mu$ g/mL digitonin, and 1.25  $\mu$ M rotenone after the first injection, 1.5  $\mu$ M oligomycin after the second injection, and 2.5  $\mu$ M antimycin A after the third injection. After the run, supernatants were carefully aspirated and protein was isolated using RIPA Lysis and Extraction Buffer (Thermo Fisher). OCR values were normalized to total protein content of each well as determined by DC Protein Assay (BioRad).

#### MTT assay

BMDMs were seeded at  $0.6 \times 10^6$  cells/mL in 96-well plates and left unstimulated or stimulated with 100 ng/mL LPS for times indicated. Succinate dehydrogenase activity was assessed by yellow 3-(4,5-dimethylthiazol-2-yl)-2,5-diphenyltetrazolium bromide (MTT) reduction to purple formazan. Cells were incubated with 1 mg/mL MTT (Sigma) for 1 hr at 37°C and 5% CO<sub>2</sub> and subsequently lysed with 4.4 mM HCl and 0.1% IGEPAL CA-630 in isopropanol. Absorbance of soluble formazan was measured spectrophotometrically at 590 nm and background signal measured at 650 nm was subtracted from this value for each sample. Cells treated 24 hr with 10 mM of the SDH inhibitor dimethyl malonate (DMM) were included as a negative control.

### Determination of mitochondrial membrane potential and reactive oxygen species (ROS) production by flow cytometry

BMDMs were seeded at  $0.6 \times 10^6$  cells/mL in non-tissue culture treated 48-well plates and left unstimulated or stimulated with 100 ng/mL LPS for times indicated. After LPS stimulation, culture medium was removed and cells were stained with 200 nM MitoTracker Red CM-H<sub>2</sub>Xros plus 100 nM MitoTracker Green FM in RPMI medium (for mitochondrial membrane potential experiments), 5  $\mu$ M MitoSOX in HBSS/+Ca/+Mg (for mitochondrial ROS), or 10  $\mu$ M DCFDA in HBSS/+Ca/+Mg (for total ROS) for 30 min at 37°C and 5% CO<sub>2</sub> in the dark. Unstained and single stained wells were included as a control. After staining, cells were washed with PBS, lifted using ice-cold PBS containing 5 mM EDTA, and transferred to 96-well FACS plates. Fluorescence was measured using a Beckman Coulter CytoFLEX flow cytometer and data were analyzed using CytExpert software.

### Determination of nitric oxide (NO), cytokine, and succinate secretion

BMDMs were seeded at  $0.6 \times 10^6$  cells/mL in 12-well plates and left unstimulated or stimulated with 100 ng/mL LPS for times indicated. Where indicated, cells were pre-treated with 500  $\mu$ M of the SDH inhibitor NPA for 30 min or cultured in glutamine-free RPMI medium for at least 3 h prior to LPS stimulation. After LPS stimulation, culture medium was harvested and used for subsequent experiments. Nitrite levels, a measure of NO production, were determined using the Griess Reagent System (Promega). Cytokine levels in cell culture supernatants and mouse blood plasma samples were determined using the Cytometric Bead Array (CBA) Mouse Inflammation Kit. Succinate levels were determined using the Colorimetric Succinate Assay Kit (Abcam), with extracellular succinate being measured in culture medium and intracellular succinate being measured in Succinate Assay Buffer cell lysates according to the manufacturer's instructions. For all assays, a standard curve was created to determine absolute quantities of nitrite, cytokines, or succinate.

## QUANTIFICATION AND STATISTICAL ANALYSIS

### Statistical analysis

Statistical analyses were performed using GraphPad Prism software. Data are reported as mean  $\pm$  SEM. Number of replicates (n) and statistical tests used are described in the figure legends, with a p value  $< 0.05$  being considered significant and levels of significance being indicated as follows: \*p  $< 0.05$ ; \*\*p  $< 0.01$ ; \*\*\*p  $< 0.001$ . In general, a two-tailed unpaired Student's t test was used when comparing two groups, and a two-way ANOVA was used when comparing interactions between genotype (WT or Nur77-KO) and stimulus (untreated or LPS-stimulated). For *in vitro* experiments, n = number of biological replicates; for *in vivo* experiments, n = number of animals. Normal distribution of data was confirmed using the D'Agostino & Pearson omnibus normality test.

### Analysis of RNA-seq data

Raw sequencing reads were filtered for low complexity or repetitive sequences and aligned to the *Mus musculus* genome (assembly mm10, Dec. 2011) using TopHat (Trapnell et al., 2009). The number of uniquely mapping read counts per gene was determined using HTSeq (Anders et al., 2015). Differential expression analysis between GFP and HA-NUR77 overexpressing cells was performed using DESeq2 (Love et al., 2014), wherein genes with a false discovery rate (FDR)-adjusted p value  $< 0.05$  and a  $\log_2$ (fold-change)  $< -0.3$  or  $> 0.3$  were considered to be differentially regulated. DESeq2 output can be found in Table S1. Pathway analysis on differentially regulated genes was performed using Metascape (Tripathi et al., 2015).

### Analysis of ChIP-seq data

Raw sequencing reads were aligned to the *Mus musculus* genome (assembly mm9, July 2007) using Burrow-Wheeler Aligner (Li and Durbin, 2009). Reads that aligned poorly or mapped to multiple locations were discarded and only reads with a mapping quality score (MAPQ)  $> 20$  were used for peak calling. RAW264.7 input sequencing data were obtained from the National Center for Biotechnology Information (NCBI) Gene Expression omnibus (GEO) database (GEO: GSM1232949, GSM1559473). High-confidence Nur77 binding sites were identified by comparing aligned input and Nur77 ChIP-seq data using two peak calling algorithms, MACS (Zhang et al., 2008) and DFilter (Kumar et al., 2013). For MACS, default settings were used except for a p value cut-off of  $10^{-7}$ . For DFilter, the settings bs = 50, ks = 30, refine, and nonzero were used with a p value cut-off of  $10^{-6}$ . Only those binding sites identified by both peak callers and present in at least two of the three biological replicates were used for further analyses.

A heatmap visualizing the raw ChIP-seq signal around Nur77 binding sites was created using seqMINER (Ye et al., 2011). H3K4me1 ChIP-seq datasets used for this analysis were obtained from the GEO database (GEO: GSE29218). Determination of genomic distribution of Nur77 binding sites and pathway analysis were performed using GREAT (McLean et al., 2010). De novo motif analysis on sequences underlying Nur77 binding sites was performed using HOMER (Heinz et al., 2010). For integration of RNA-seq and ChIP-seq datasets, genomic coordinates in the ChIP-seq dataset were converted to *Mus musculus* assembly mm10 using the UCSC Genome Browser liftOver tool (Kent et al., 2002). Prediction of direct Nur77 target genes based on both datasets was performed using BETA (Wang et al., 2013).

## DATA AND SOFTWARE AVAILABILITY

### Data resources

The accession number for the raw and processed ChIP-seq and RNA-seq data reported in this paper is GEO: GSE102394.

**Cell Reports, Volume 24**

**Supplemental Information**

**Nuclear Receptor Nur77 Limits the Macrophage  
Inflammatory Response through Transcriptional  
Reprogramming of Mitochondrial Metabolism**

**Duco Steven Koenis, Lejla Medzikovic, Pieter Bas van Loenen, Michel van Weeghel, Stephan Huveneers, Mariska Vos, Ingrid Johanna Evers-van Gogh, Jan Van den Bossche, Dave Speijer, Yongsoo Kim, Lodewyk Wessels, Noam Zelcer, Wilbert Zwart, Eric Kalkhoven, and Carlie Jacoba de Vries**

**Figure S1**

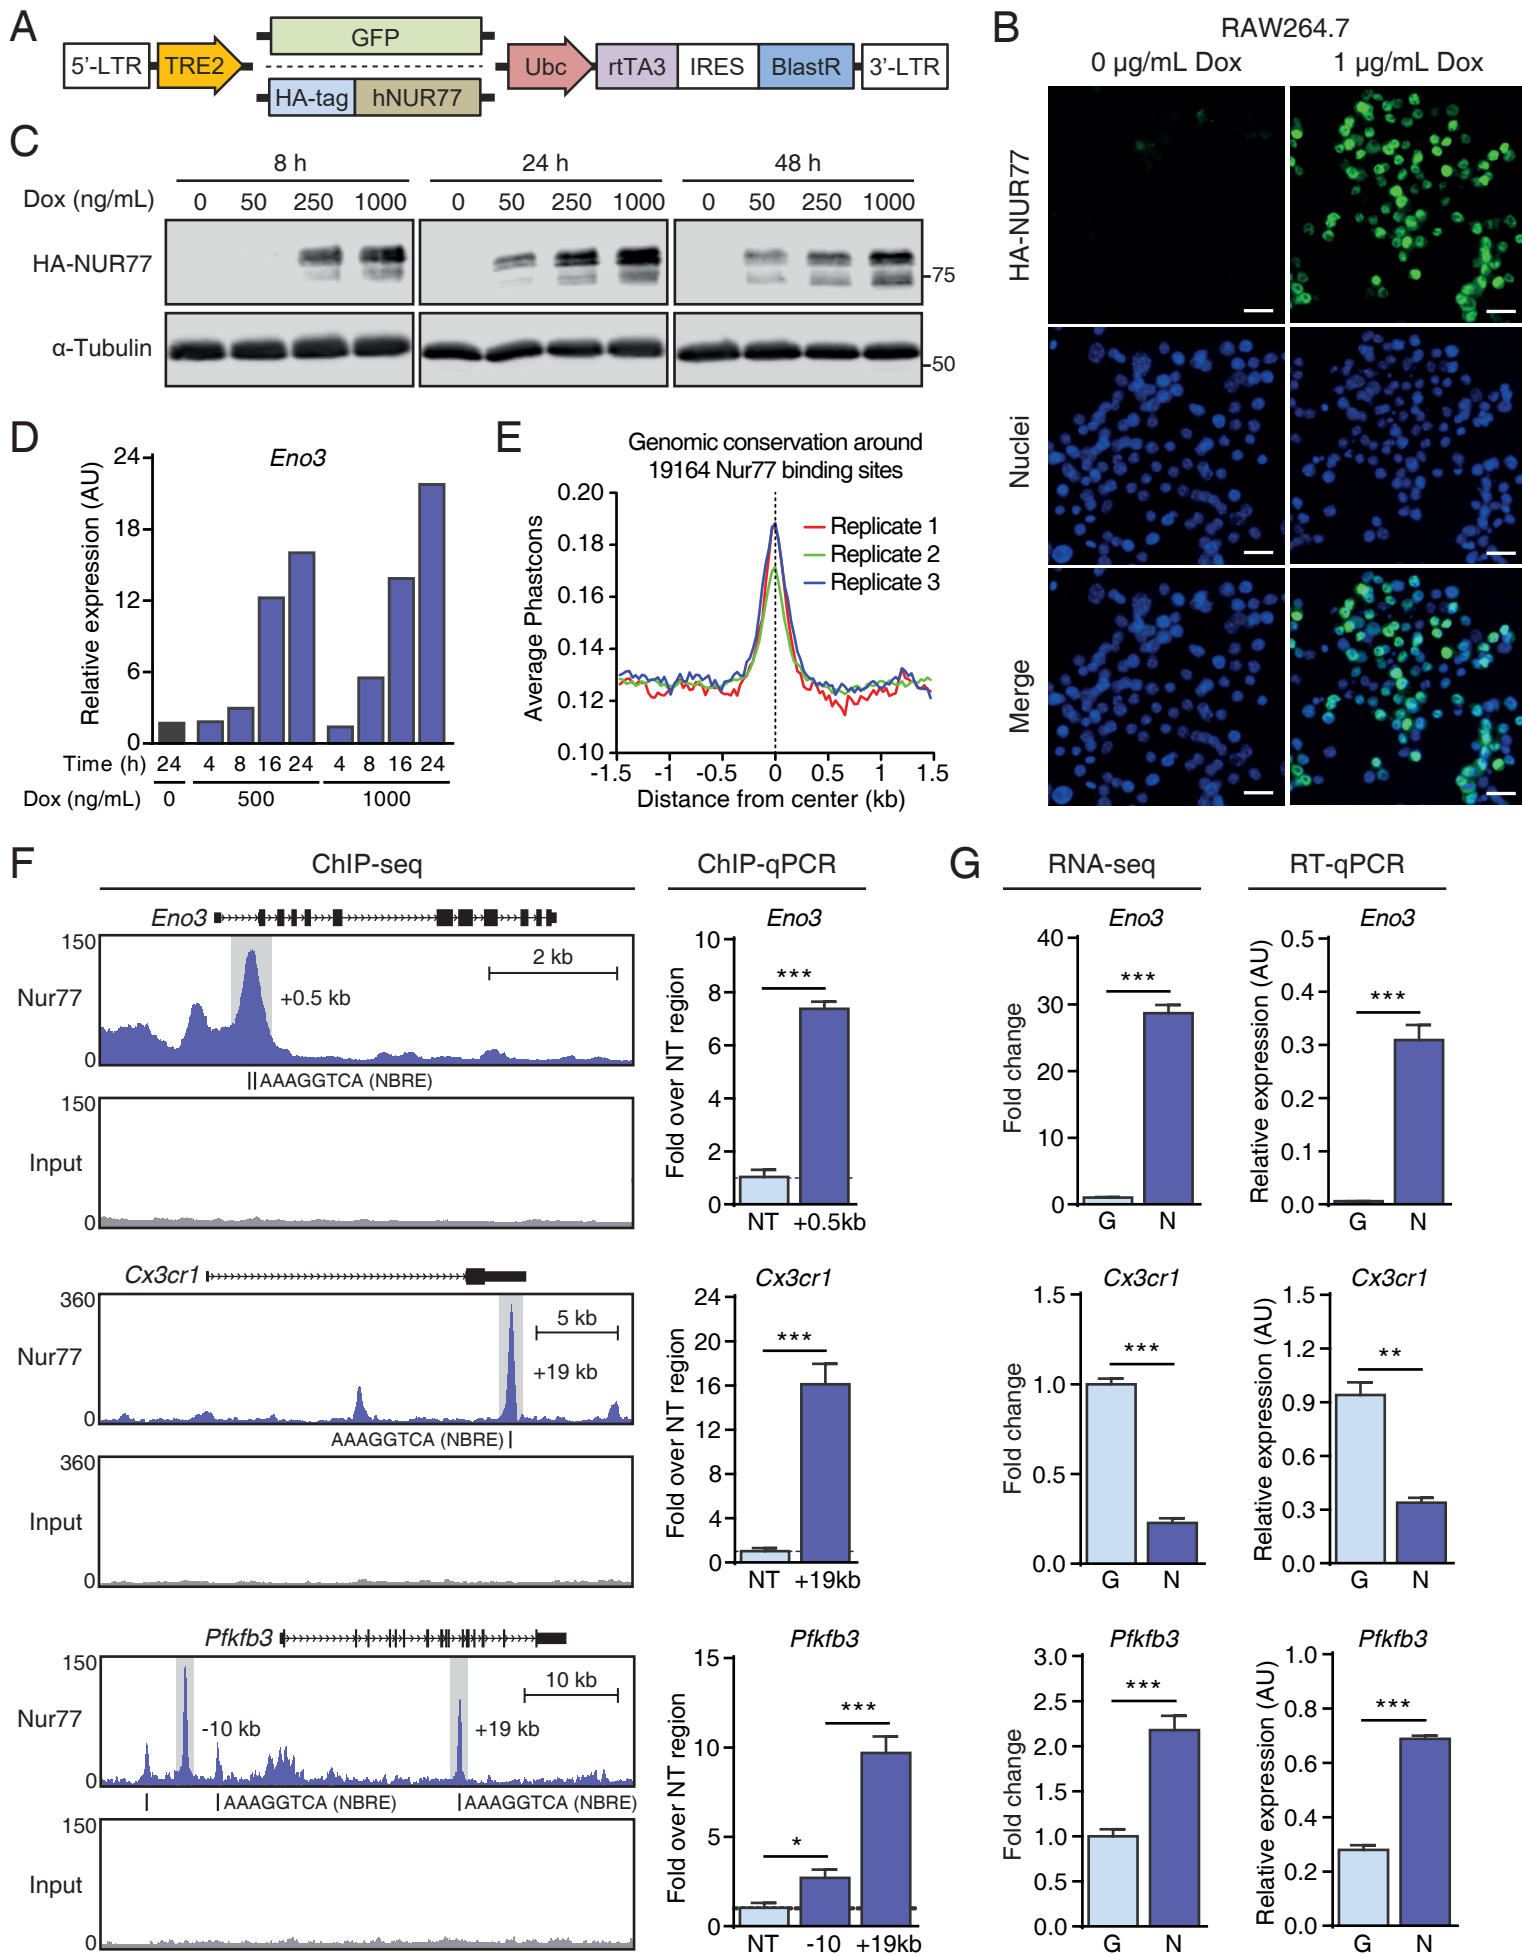

**Figure S1. Validation experiments for RAW264.7 stable cell line and Nur77 ChIP-seq and RNA-seq datasets; related to Figure 1.**

(A) pINDUCER20b-GFP and pINDUCER20b-HA-NUR77 plasmids used to create RAW264.7 stable cell lines with doxycycline (Dox)-inducible overexpression of green fluorescent protein (GFP) or HA-tagged NUR77 (HA-NUR77).

(B) Immunofluorescence microscopy of HA-NUR77 expression in RAW264.7 stable cell line after 24 h stimulation with 1  $\mu\text{g}/\text{mL}$  Dox. Scale bar indicates 20  $\mu\text{m}$ .

(C) Western blot for protein expression of HA-NUR77 in RAW264.7 stable cell line in response to indicated Dox concentrations and incubation times.  $\alpha$ -Tubulin was used as loading control. Numbers on the right: molecular weight in kDa.

(D) Gene expression of established Nur77 target gene *Eno3* in response to varying Dox concentrations and incubation times in RAW264.7 stable cell line.

(E) PhastCons placental mammal sequence conservation score for 19164 Nur77 binding sites.

(F) Genome browser view of Nur77 or input control ChIP-seq signal at indicated gene loci. Bar graphs show ChIP-qPCR validation for Nur77 binding in grey shaded areas. For ChIP-qPCR, Nur77 binding at a non-target region (NT; same data used in all 3 graphs) or gene-specific target region after 18 h stimulation with 1  $\mu\text{g}/\text{mL}$  Dox was compared. NBRE = Nur77 response element.

(G) Fold change from RNA-seq dataset and RT-qPCR validation for several genes differentially expressed in RNA-seq dataset. Target gene expression after GFP (G) or HA-NUR77 (N) overexpression induced by 18 h stimulation with 1  $\mu\text{g}/\text{mL}$  Dox was compared.

For (F-G), data are shown as mean  $\pm$  SEM (n=3). p-values were calculated using two-tailed Student's t-test. \*p<0.05; \*\*p<0.01; \*\*\*p<0.001.



**Figure S2**

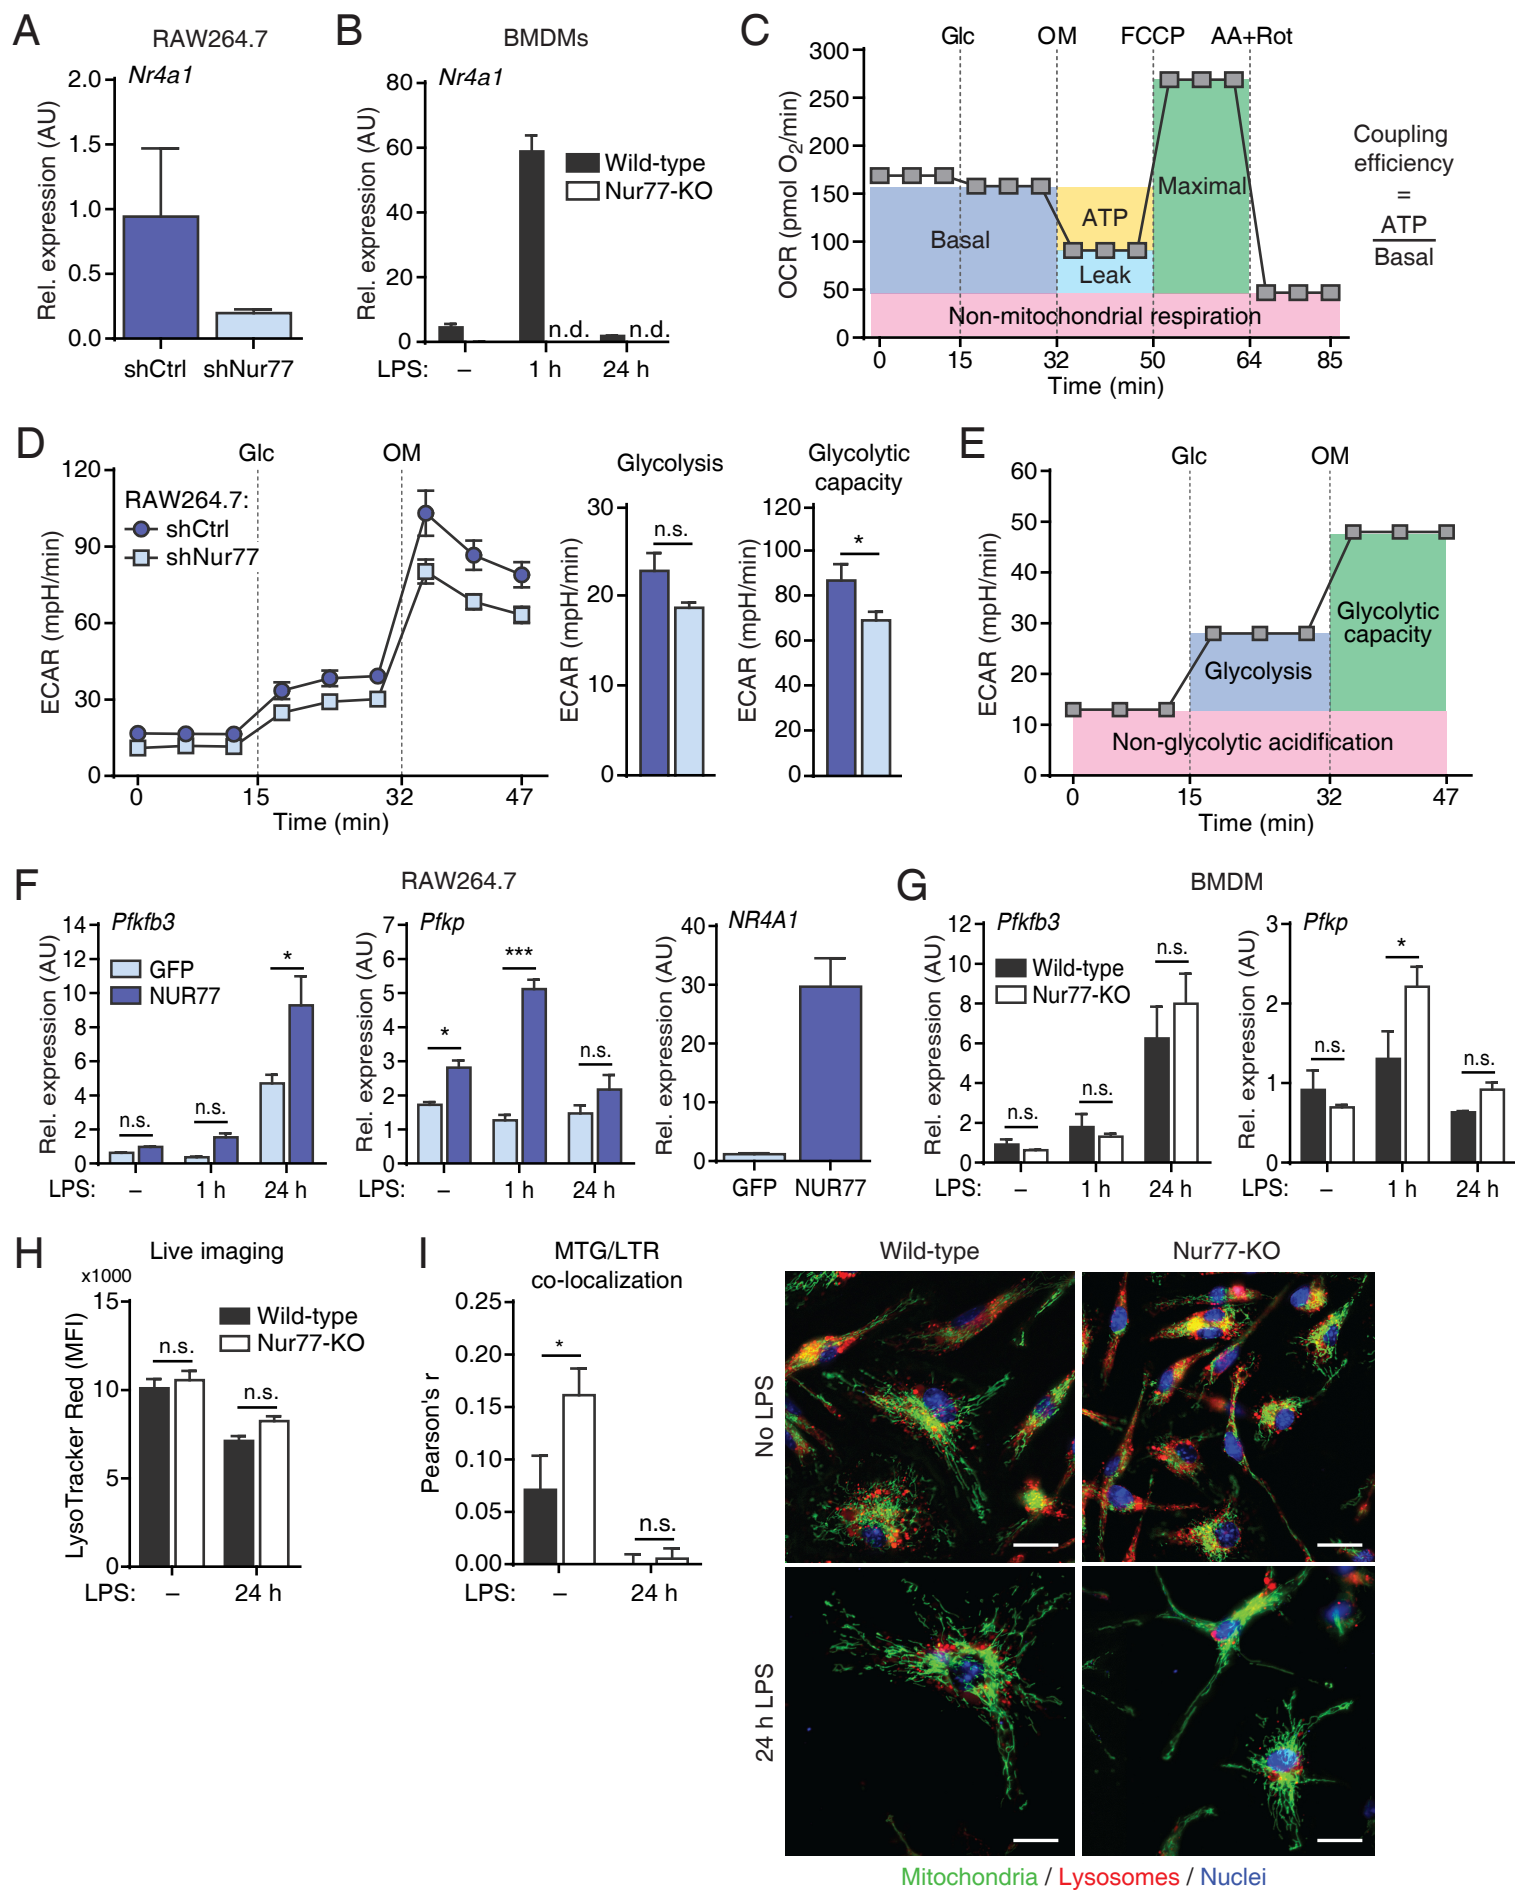

**Figure S2. Minor effects of Nur77 on glycolysis in macrophages; related to Figure 2.**

(A-B) Gene expression of endogenous Nur77 (*Nr4a1*) after shRNA-mediated knockdown in RAW264.7 (A), or in WT and Nur77-KO BMDMs left untreated or stimulated with LPS for times indicated (B).

(C) Example graph showing OXPHOS parameter calculation from OCR values.

(D) ECAR in RAW264.7 after knockdown of Nur77 (shNur77) versus control (shCtrl) followed by sequential injection of Glc and OM. Bar graphs show parameters of glycolysis derived from ECAR values as illustrated in (E).

(E) Example graph showing glycolytic parameter calculation from ECAR values.

(F-G) Expression of glycolytic genes and exogenous NUR77 in RAW264.7 untreated or stimulated with 500 ng/mL LPS for times indicated while overexpressing GFP or NUR77 (F), or in WT and Nur77-KO BMDMs left untreated or stimulated with LPS for times indicated (G).

(H) Lysosomal abundance in untreated or 24 h LPS-stimulated WT and Nur77-KO BMDMs determined by live-cell imaging of cells stained with LysoTracker Red DND-99. MFI = mean fluorescence intensity.

(I) Co-localization between MitoTracker Green FM (MTG) and LysoTracker Red DND-99 (LTR) in untreated or 24 h LPS-stimulated WT and BMDMs expressed as Pearson's correlation coefficient determined by live-cell imaging of co-stained cells. Micrographs on the right show representative co-stained cells. Scale bar = 20  $\mu$ m.

For (A-B, D, F-I), data are shown as mean  $\pm$  SEM (n=3 for A,B,D,F,G; n=35-50 cells for H; n=4 image panels for I). p-values were calculated using two-tailed Student's t-test. \*p<0.05; \*\*p<0.01; \*\*\*p<0.001.

Figure S3

A  Wild-type  Nur77-KO

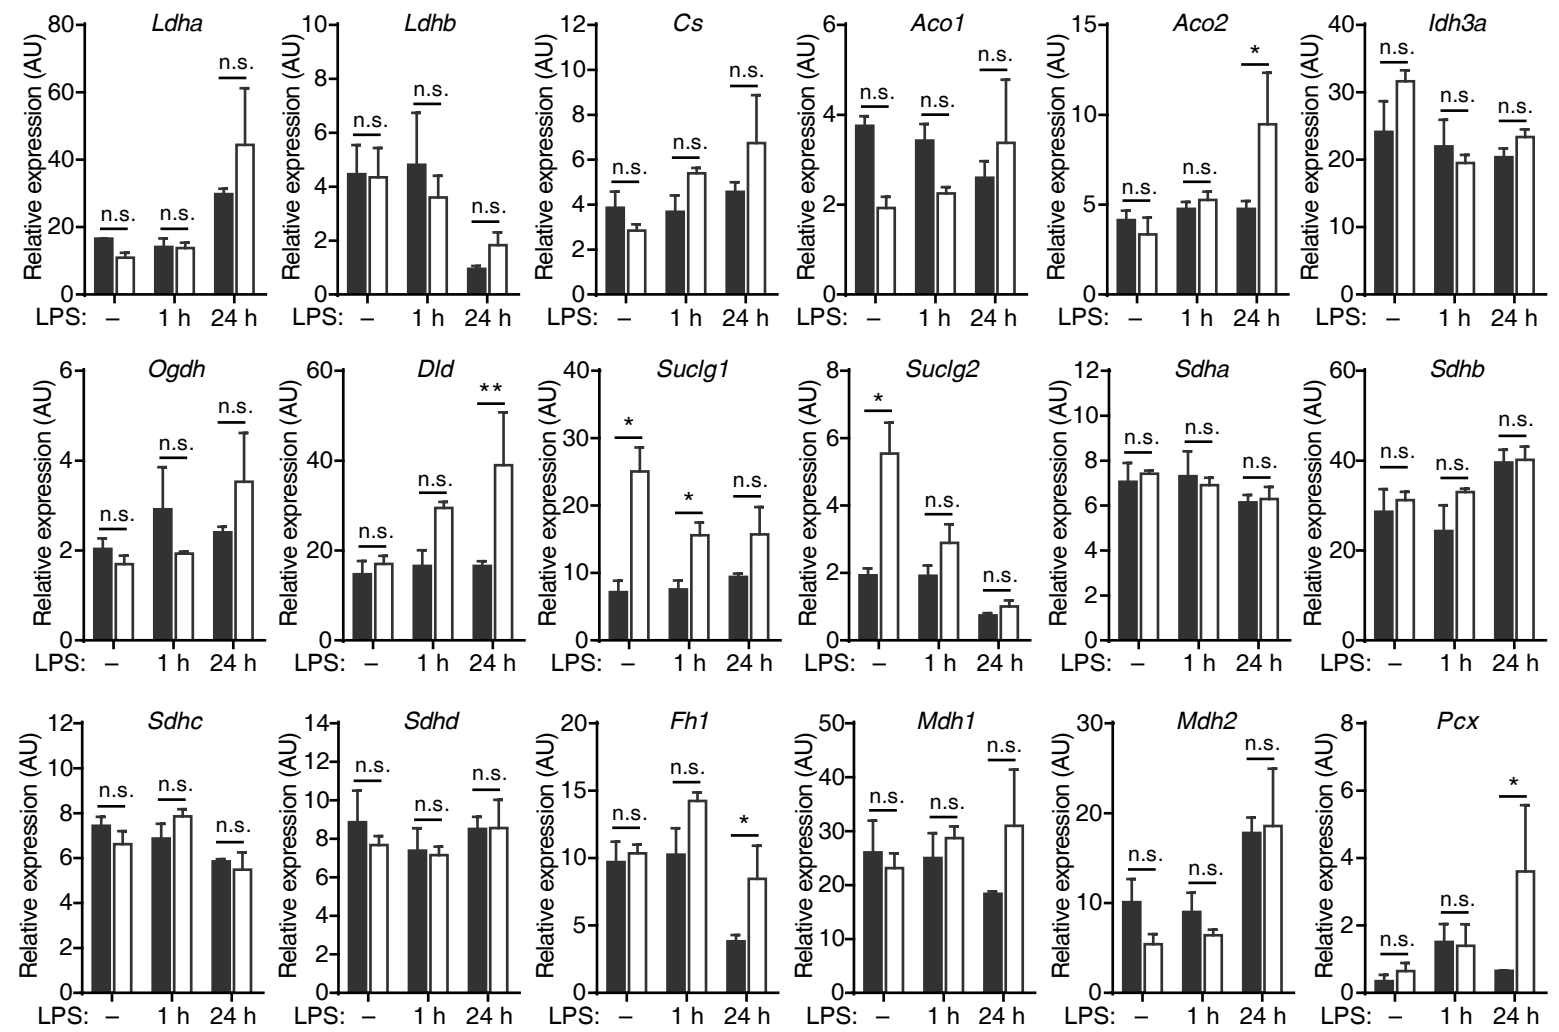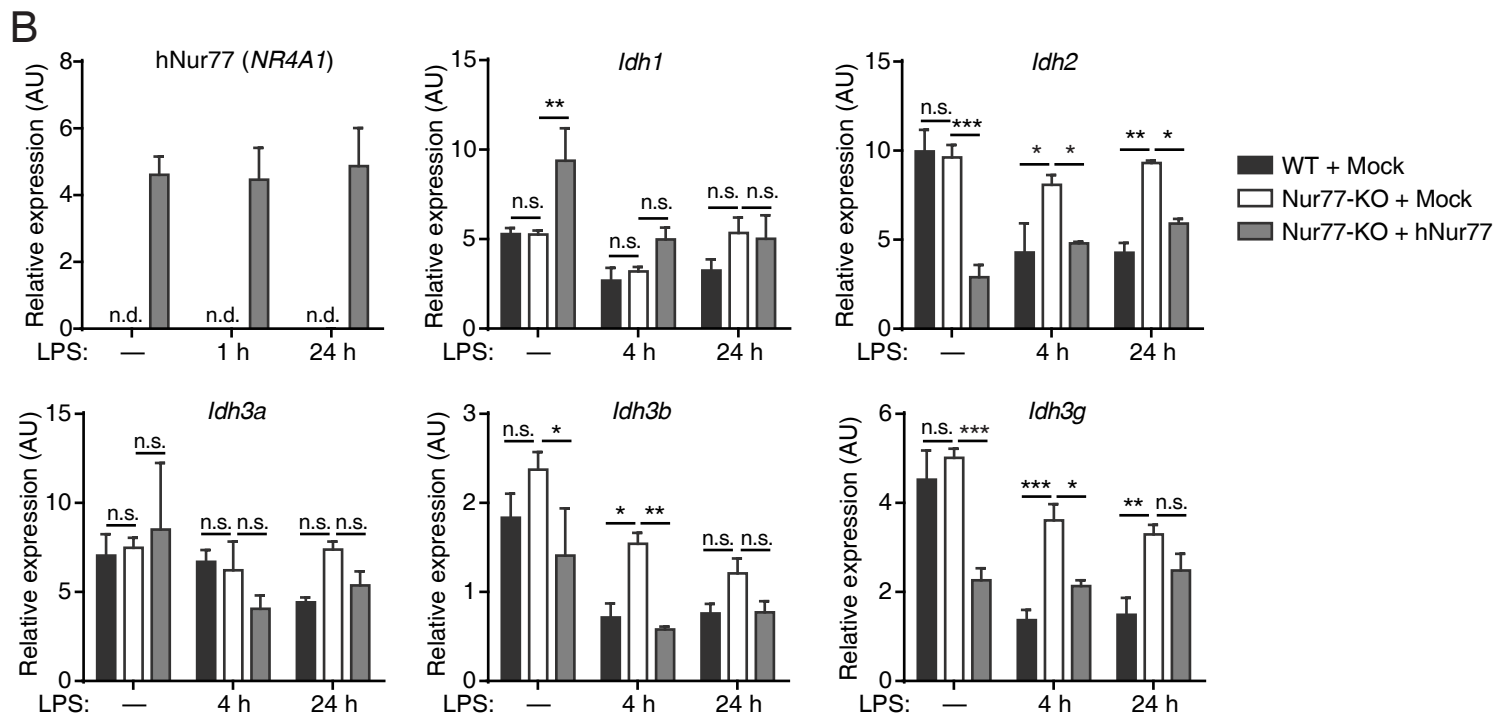

**Figure S3. Nur77-deficient macrophages have largely unaltered expression of several TCA cycle enzyme genes, while mitochondrial IDH genes are repressed by Nur77 overexpression; related to Figure 3.**

(A) Expression of glycolysis and TCA cycle enzyme genes in WT and Nur77-KO BMDMs left untreated or stimulated with LPS for times indicated.

(B) Expression of human Nur77 (*NR4A1*) and IDH-encoding genes in WT and Nur77-KO BMDMs transduced with human Nur77 (hNur77) or control (Mock) lentivirus and either left untreated or stimulated with LPS for times indicated.

Data are shown as mean  $\pm$  SEM (n=3). p-values were calculated using two-tailed Student's t-test (A) or two-way ANOVA (B). \*p<0.05; \*\*p<0.01; \*\*\*p<0.001.

# Figure S4

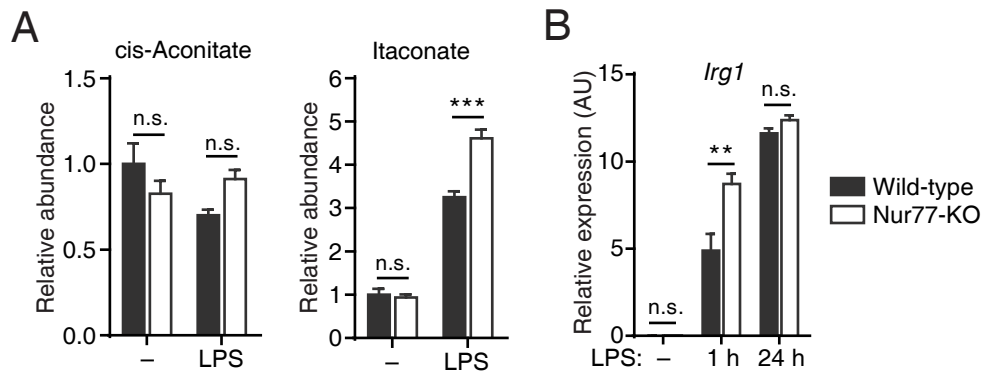

**Figure S4. Nur77-deficient macrophages produce more itaconate in response to LPS; related to Figure 4.**

(A) Relative abundance of cis-aconitate and itaconate in WT and Nur77-KO BMDMs from metabolomics dataset.

(B) Gene expression of *Irg1* in WT and Nur77-KO BMDMs left untreated or stimulated with LPS for times indicated.

Data are shown as mean  $\pm$  SEM (n=4-6 for A, n=3 for B). p-values were calculated using two-tailed Student's ttest. \*\*p<0.01; \*\*\*p<0.001.



# Figure S5

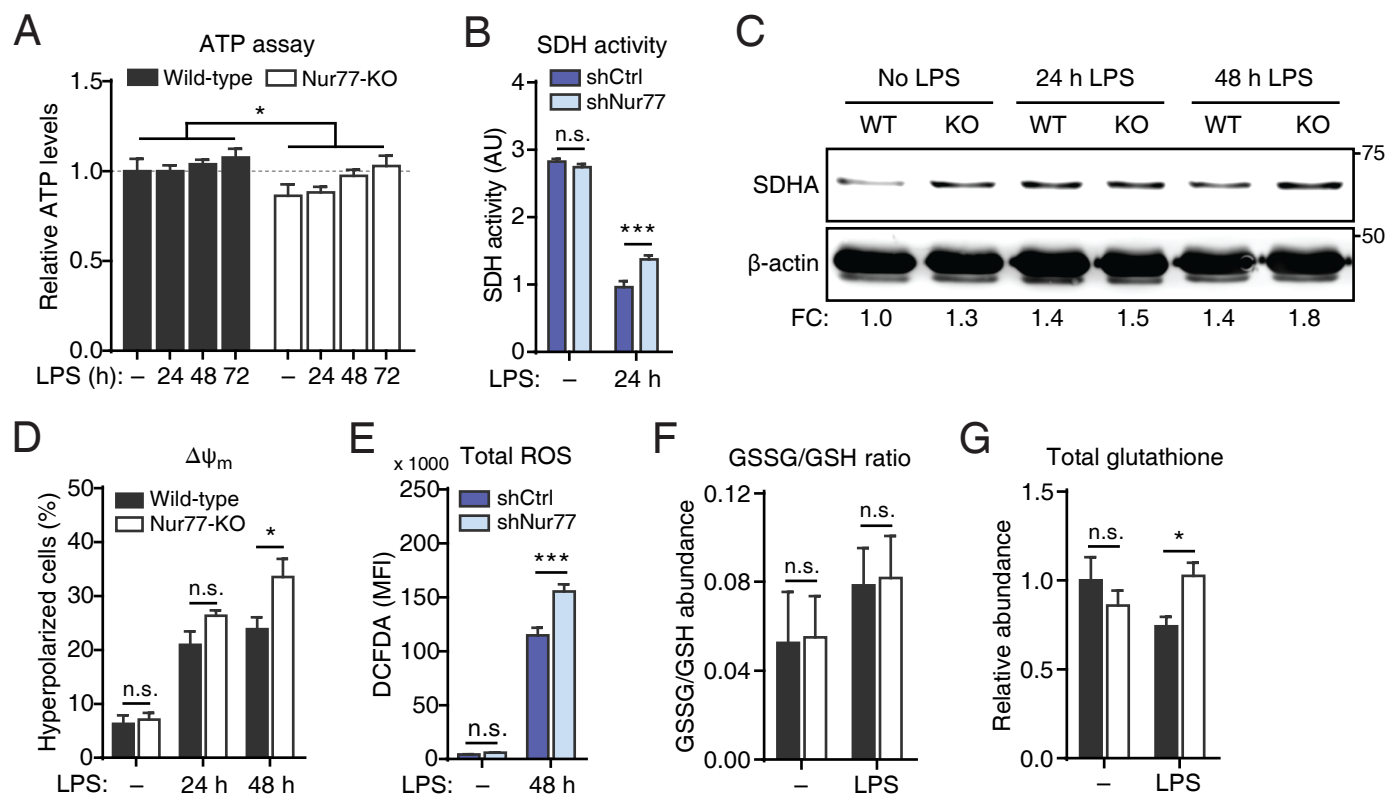

**Figure S5. Nur77 deficiency does not alter SDH expression; related to Figure 5.**

(A) Relative intracellular ATP levels in WT and Nur77-KO BMDMs left untreated or stimulated with LPS for times indicated. Related to Figure 5B.

(B) SDH activity determined by MTT assay in RAW264.7 after shRNA-mediated knockdown of Nur77 (shNur77) versus control shRNA (shCtrl) and untreated or stimulated with 500 ng/mL LPS for 24 h.

(C) Western blot for SDHA protein in WT and Nur77-KO BMDMs left untreated or stimulated with LPS for times indicated.  $\beta$ -Actin was used as loading control. Numbers on the right: molecular weight in kDa. Numbers at the bottom: FC in  $\beta$ -actin-normalized SDHA band intensity relative to unstimulated WT. Blot shown is representative of three independent experiments.

(D) Quantification of percentage of WT and Nur77-KO BMDMs with hyperpolarized mitochondria after stimulation with LPS for times indicated. Related to Figure 5F.

(E) ROS production determined by flow cytometry in RAW264.7 after knockdown of Nur77 (shNur77) versus control (shCtrl), followed by stimulation with 500 ng/mL LPS for 48 h and staining with DCFDA.

(F-G) Ratio of oxidized (GSSG) to reduced (GSH) glutathione (F) and relative abundance of total glutathione (G) in WT and Nur77-KO BMDMs from metabolomics dataset.

For (A-B, D-G), data are shown as mean  $\pm$  SEM (n=3 for A, D-E; n=8 for B; n=4-6 for F-G). p-values were calculated using two-tailed Student's t-test (B, D-H) or two-way ANOVA with Tukey post-hoc test (A). \*p<0.05; \*\*p<0.01; \*\*\*p<0.001.

# Figure S6

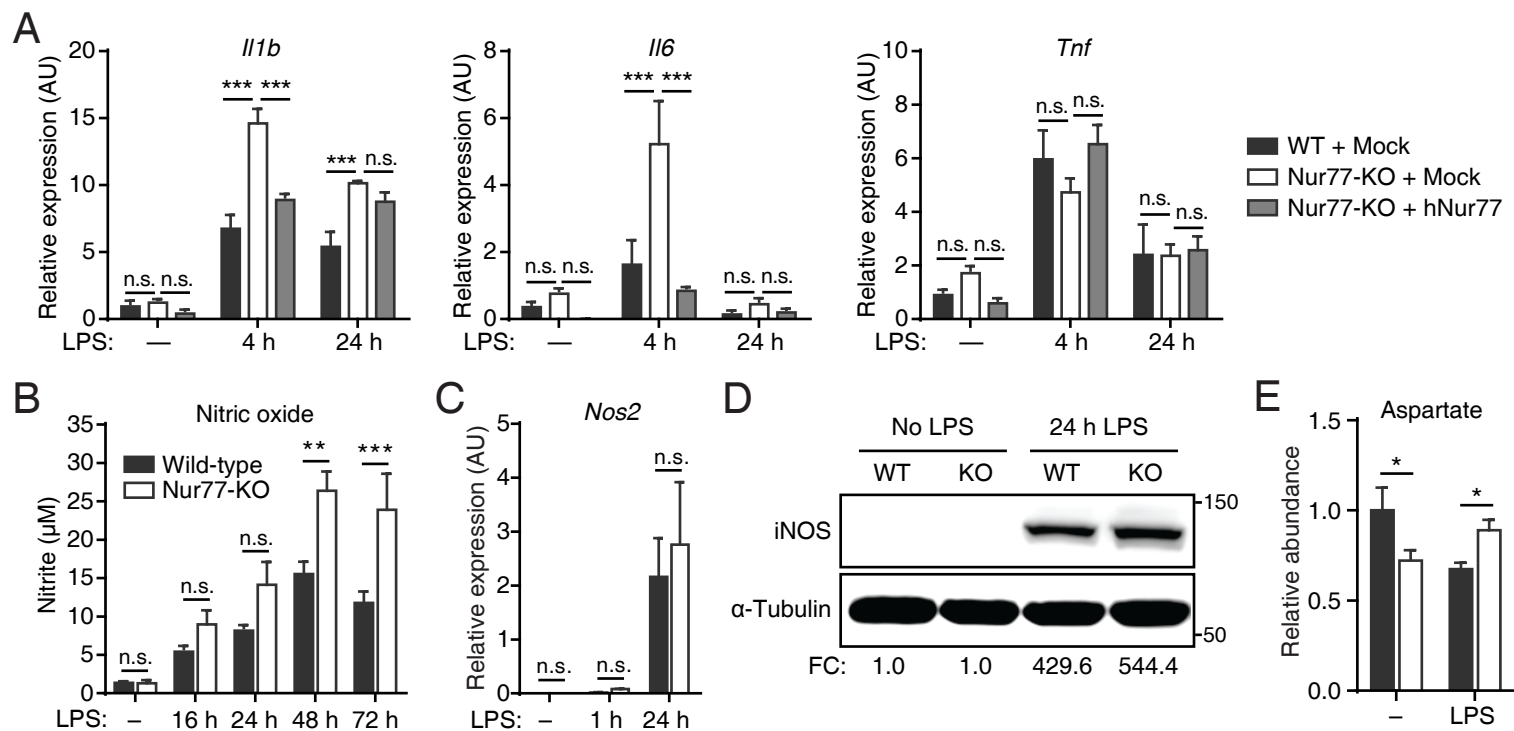

**Figure S6. Increased nitric oxide production but unchanged *Nos2* gene and iNOS protein expression in Nur77-KO BMDMs; related to Figure 6.**

(A) Cytokine gene expression in WT and Nur77-KO BMDMs transduced with human Nur77 (hNur77) or control (Mock) lentivirus as in Figure S3B and either left untreated or stimulated with LPS for times indicated.

(B-C) NO secretion (B) and *Nos2* gene expression (C) in WT and Nur77-KO BMDMs left untreated or stimulated with LPS for times indicated.

(D) Western blot for iNOS protein in WT and Nur77-KO BMDMs left untreated or stimulated with LPS for 24 h.  $\alpha$ -Tubulin was used as loading control. Numbers on the right: molecular weight in kDa. Numbers at the bottom: FC in  $\alpha$ -Tubulin-normalized iNOS band intensity relative to unstimulated WT. Blot shown is representative of two independent experiments.

(E) Relative abundance of aspartate in WT and Nur77-KO BMDMs from metabolomics dataset.

For (A-C, E), data are shown as mean  $\pm$  SEM (n=3 for A-C; n=4-6 for E). p-values were calculated using two-way ANOVA with Tukey post-hoc test. \*p<0.05; \*\*p<0.01; \*\*\*p<0.001.

# Figure S7

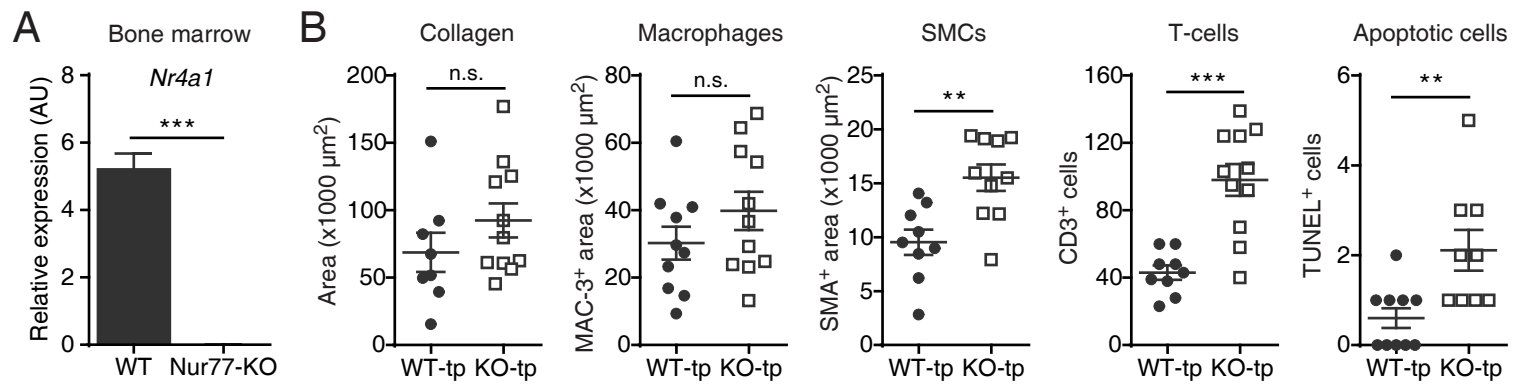

**Figure S7. Bone marrow Nur77 deficiency leads to increased numbers of SMCs, T-cells, and apoptotic cells, but unchanged collagen or macrophage content in atherosclerotic lesions; related to Figure 7.**

(A) Mouse Nur77 (*Nr4a1*) gene expression in bone marrow cells harvested from WT and Nur77-KO mice.

(B) Characterization of atherosclerotic lesions from WT-tp and KO-tp mice described in Figure 7A, showing quantification of collagen deposition and macrophage (MAC-3<sup>+</sup>), smooth muscle cell (SMC; SMA<sup>+</sup>), T-cell (CD3<sup>+</sup>), and apoptotic cell (TUNEL<sup>+</sup>) content in each lesion.

For (B), each filled circle (WT-tp) or hollow square (KO-tp) indicates one mouse and horizontal bars indicate mean  $\pm$  SEM. p-values were calculated using two-tailed Student's t-test. \*p<0.05; \*\*p<0.01; \*\*\*p<0.001.
